1           **Identification of Fis1 interactors in *Toxoplasma gondii* reveals a**  
2                   **novel protein required for peripheral distribution of the**  
3                           **mitochondrion.**

4   Running title: *Toxoplasma* LMF1, a mitochondrial morphology regulator

5   Kylie Jacobs<sup>1</sup>, Robert Charvat<sup>2</sup>, Gustavo Arrizabalaga<sup>1,3\*</sup>

6

7   <sup>1</sup>*Department of Microbiology and Immunology, Indiana University School of Medicine,*  
8   *Indianapolis, IN, USA.*

9   <sup>2</sup>*Department of Biology, University of Findlay, Findlay, OH, USA*

10   <sup>3</sup>*Department of Pharmacology and Toxicology, Indiana University School of Medicine,*  
11   *Indianapolis, IN, USA.*

12

13

14   \*Corresponding author

15   E-mail: [garrizab@iu.edu](mailto:garrizab@iu.edu)

16 **ABSTRACT**

17 *Toxoplasma gondii*'s singular mitochondrion is very dynamic and undergoes  
18 morphological changes throughout the parasite's life cycle. During parasite division, the  
19 mitochondrion elongates, enters the daughter cells just prior to cytokinesis and  
20 undergoes fission. Extensive morphological changes also occur as the parasite  
21 transitions from the intracellular to the extracellular environment. We show that  
22 treatment with the ionophore monensin causes reversible constriction of the  
23 mitochondrial outer membrane, and that this effect depends on the function of the  
24 fission related protein Fis1. We also observed that mislocalization of the endogenous  
25 Fis1 causes a dominant negative effect that affects the morphology of the  
26 mitochondrion. As this suggests Fis1 interacts with proteins critical for maintenance of  
27 mitochondrial structure, we performed various protein interaction trap screens. In this  
28 manner we identified a novel outer mitochondrial membrane protein, LMF1, which is  
29 essential for positioning of the mitochondrion in intracellular parasites. Normally, while  
30 inside a host cell, the parasite mitochondrion is maintained in a lasso shape that  
31 stretches around the parasite periphery where it has regions of coupling with the  
32 parasite pellicle, suggesting the presence of membrane contact sites. In intracellular  
33 parasites lacking LMF1 the mitochondrion is retracted away from the pellicle and  
34 instead is collapsed, as only normally seen in extracellular parasites. We show that this  
35 phenotype is associated with defects in parasite fitness and mitochondrial segregation.  
36 Thus, LMF1 is necessary for mitochondrial association with the parasite pellicle during  
37 intracellular growth and proper mitochondrial morphology is a prerequisite for  
38 mitochondrial division.

39 **IMPORTANCE**

40 *Toxoplasma gondii* is an opportunistic pathogen that can cause devastating tissue  
41 damage in the immunocompromised and the congenitally infected. Current therapies  
42 are not effective against all life stages of the parasite and many cause toxic effects. The  
43 single mitochondrion of this parasite is a validated drug target and it changes its shape  
44 throughout its life cycle. When the parasite is inside of a cell, the mitochondrion adopts  
45 a lasso shape that lies in close proximity to the pellicle. The functional significance of  
46 this morphology is not understood nor are the proteins involved currently known. We  
47 have identified a protein that is required for proper mitochondrial positioning at the  
48 periphery and that likely plays a role in tethering this organelle. Loss of this protein  
49 results in dramatic changes to the mitochondrial morphology and significant parasite  
50 division and propagation defects. Our results give important insight into the molecular  
51 mechanisms regulating mitochondrial morphology.

## 52 INTRODUCTION

53 *Toxoplasma gondii* is an opportunistic protozoan parasite that can infect nearly  
54 any nucleated cell in a wide range of warm-blooded organisms. This promiscuity  
55 contributes to *Toxoplasma gondii* being one of the most widespread and successful  
56 parasites in the world. It has been estimated that approximately one-third of the world's  
57 human population is infected with *Toxoplasma* (1). *Toxoplasma* infections in humans  
58 are usually the result of the ingestion of parasite oocysts deposited in the feces of  
59 felines or of tissue cysts present in raw or undercooked meat from infected warm-  
60 blooded animals. Despite all of these routes of infection, there are generally few side  
61 effects associated with toxoplasmosis because its acute state is susceptible to the  
62 healthy immune system. However, the parasite can evade the immune response by  
63 converting to a latent encysted form, thus establishing a chronic infection. In  
64 immunocompromised individuals and lymphoma patients, new infections or re-activation  
65 of pre-existing cysts can lead to toxoplasmic encephalitis, among other complications.  
66 Additionally, in congenital infections, toxoplasmosis can lead to blindness, severe  
67 neurological problems or even death given the immature nature of the fetal immune  
68 system. Although there are drugs that target acute toxoplasmosis, they are often toxic  
69 and all are ineffective against the chronic stage. Therefore, it is important to identify  
70 novel and unique drug targets that are effective against multiple stages of the parasite  
71 life cycle.

72 One interesting feature of *Toxoplasma* is its singular mitochondrion, which is very  
73 large and extends to the periphery of the cell. In addition to its plant-like features, such  
74 as tubular cristae, the *Toxoplasma* mitochondrion has a streamlined mitochondrial

75 genome only encoding 3 proteins: *cox1*, *cob*, and *cox3* (2). These unique features of the  
76 mitochondrion, along with its essentiality for parasite survival, make it an interesting  
77 drug target. The clinical effectiveness of the mitochondrial inhibitor atovaquone against  
78 *Toxoplasma* and related parasites, highlights the validity of this organelle as a target for  
79 anti-parasitic therapy (3). Atovaquone acts by mimicking ubiquinone and competitively  
80 binding to the cytochrome bc<sub>1</sub> complex, which blocks the electron transport chain and  
81 prevents energy production in the mitochondrion (4). Other electron transport chain  
82 inhibitors, such as the endochin-like quinolones, are still being studied for efficacy in  
83 *Toxoplasma* and *Plasmodium* (5, 6). Aspects of the apicomplexan mitochondrion that  
84 remains unexplored as a potential target are its morphology and division. Chemical  
85 inhibition of mitochondrial fission has been shown to have cytoprotective effects in  
86 cardiovascular injury models (7) and to prevent cell proliferation in lung cancer (8) and  
87 glioblastoma (9). Thus, in depth understanding of the regulation of mitochondrial  
88 morphology and dynamics in *Toxoplasma*, could reveal novel therapeutic targets.

89         The mitochondrion of *Toxoplasma* is highly dynamic and exhibits significant  
90 morphological changes during the parasite's lifecycle and in response to various  
91 stressors. As there is only one mitochondrion per parasite, its division is tightly  
92 coordinated with the division of the rest of the parasite (10). *Toxoplasma* divides by  
93 endodyogeny, a specialized process through which two daughter cells form within the  
94 mother parasite and during which each organelle is either made de novo or elongated  
95 and divided for incorporation into the daughter parasites. The mitochondrion divides  
96 very late in this process and is not incorporated into the daughter parasites until the  
97 parasites have almost completely emerged from the mother parasite (3). The proteins

98 involved in the budding, division, and segregation of mitochondrial material have not  
99 been thoroughly examined and *Toxoplasma gondii* is lacking almost all of the  
100 homologues of proteins used in these processes. For example, the mitochondrial  
101 division machinery is made up of three components: a fission protein to recruit proteins  
102 necessary for division, adaptor proteins to provide a scaffold, and a dynamin-related  
103 protein to cause the final scission of the mitochondrion (11). *Toxoplasma* encodes one  
104 homolog for the fission protein, Fis1 (TGGT1\_263323) and three potential dynamin  
105 related proteins (Drps): DrpA, DrpB, and DrpC. TgDrpA and TgDrpB have been shown  
106 to be required for apicoplast replication and secretory organelle biogenesis, respectively  
107 (12, 13). TgDrpC is divergent from the typical Drp due to the absence of a conserved  
108 GTPase Effector Domain, which is generally required for function. We recently showed  
109 that TgDrpC interacts with proteins that exhibit homology to those involved in vesicle  
110 transport (14, 15). Additionally, TgDrpC localizes to cytoplasmic puncta that redistribute  
111 to the growing edge of the daughter parasites during endodyogeny. Loss of TgDrpC  
112 stalls the division process and leads to rapid deterioration of multiple organelles,  
113 including the mitochondrion. Independent work also shows that this loss halts  
114 mitochondrial division (16). Therefore, TgDrpC appears to contribute to multiple  
115 processes including vesicular trafficking, organelle stability, division, and potentially  
116 mitochondrial division.

117 After repeated division cycles, the parasites egress from the cell and are exposed to  
118 the extracellular environment, where the mitochondrion alters its morphology. When  
119 *Toxoplasma* is within a host cell it maintains its mitochondrion in a lasso shape that  
120 spans the parasite's periphery and is adjacent to the parasite pellicle (2, 10, 17).

121 Immediately after egress the mitochondrion retracts from the periphery of the parasite  
122 and transitions to a “sperm-like” morphology, where the majority of mitochondrial  
123 material is at the apical end of the parasite with a tail of material extending towards the  
124 basal end (17). Prolonged exposure to the extracellular environment, results in  
125 transition to a completely collapsed mitochondrion. Upon reinvasion, the mitochondrion  
126 returns to the “lasso” shape almost immediately (17). Electron microscopy of parasites  
127 with lasso shaped mitochondrion reveals the presence of regions of close abutment  
128 between the outer mitochondrion membrane (OMM) and the inner membrane complex  
129 (IMC), in which the membranes retain a constant distance over stretches of 100 nm–  
130 1000 nm (17). The average distance between the OMM and the IMC was calculated to  
131 be approximately 25 nm, which would suggest the presence of membrane contact sites  
132 (18, 19). Neither the functional significance nor the components of the proposed contact  
133 between the mitochondrion and the pellicle are known.

134 We have also observed that the mitochondrion of *Toxoplasma* significantly changes  
135 its morphology in response to exposure to the anti-coccidial drug monensin. Monensin  
136 is a sodium hydrogen exchanger that induces oxidative stress (20) and autophagic cell  
137 death (21). We demonstrate that monensin’s effect on the mitochondrion morphology is  
138 reversible, suggesting that *Toxoplasma* has mechanisms to rearrange the mitochondrial  
139 structure in response to drug induced stress. As the mitochondrion appears broken  
140 down upon monensin treatment we investigated the role of the fission machinery on this  
141 phenomenon. Here, we show that monensin induces a reversible constriction of the  
142 outer mitochondrial membrane and that this effect is in part dependent on the fission  
143 protein Fis1. We also show that, although Fis1 is not required for parasite survival,

144 mislocalization of Fis1 away from the outer mitochondrial membrane results in aberrant  
145 mitochondrial morphology. We hypothesize that the dominant negative effect caused by  
146 mislocalization of Fis1 is due to misdirecting critical proteins away from the  
147 mitochondrion. Accordingly, we identified interactors of Fis1. One such interactor,  
148 TgGT1\_265180, proved to be required for parasite growth, division, and mitochondrial  
149 segregation. Importantly, the mitochondria of intracellular parasites lacking this Fis1  
150 interactor are not lasso shaped, but instead are collapsed away from the parasite  
151 periphery. Accordingly, we hypothesize that this novel protein is part of the proposed  
152 scaffold that mediates membrane contact sites between the mitochondrion and the  
153 parasite pellicle.



## 154 RESULTS

### 155 Monensin-induced mitochondrial remodeling is reversible

156 We had previously observed that treatment with the polyether ionophore monensin  
157 induced gross morphological changes in *Toxoplasma*, including alterations in the Golgi  
158 apparatus and mitochondrion (20). In particular, the mitochondrion, which under normal  
159 growth conditions appears as a lasso along the periphery of the parasite, becomes  
160 fragmented in appearance upon monensin treatment (Fig. 1A). To assess whether this  
161 effect on the parasite mitochondrion was reversible, parasites were treated with either  
162 vehicle or 1 mM monensin for 12 hours followed with a 12 hours recovery period on  
163 normal growth medium. Under vehicle-treated conditions, parasites exhibited intact  
164 mitochondria in greater than 91% of vacuoles (Figs. 1A and B). By contrast, following 12  
165 hours of monensin treatment, only  $6.25 \pm 11.8\%$  of vacuoles contained parasites with  
166 intact mitochondria, congruent with previous findings (Figs. 1A and B). Interestingly, this  
167 phenotype is reversed when the drug is removed and parasites are allowed to recover  
168 for 12 hours. After the 12-hour recovery period, in  $79.5 \pm 5.5\%$  of vacuoles all parasites  
169 show normal mitochondrial morphology (Figs. 1A and B). Of note, there was no  
170 observed reduction in total number of parasite-containing vacuoles between the cultures  
171 for which the drug was removed and those for which it was not, indicating a genuine  
172 recovery and not an expansion of surviving parasites.

173 To determine whether mitochondrial remodeling is a generalized drug response,  
174 parasites were challenged with atovaquone and myxothiazol, both cytochrome  $bc_1$   
175 complex inhibitors, and pyrimethamine, a dihydrofolate reductase inhibitor not known to  
176 affect mitochondrial function. After 12 hours of atovaquone treatment, only  $27.3 \pm 15.5\%$

177 of parasites showed intact mitochondria and, just as what is observed with monensin,  
178 this effect was reversed by removal of drug and a 12-hour drug-free recovery period  
179 (75.8±13.0% intact mitochondria, Fig. 1C). By contrast, a lethal dose of myxothiazol (50  
180 g/mL, (22, 23)) had little effect on mitochondrial morphology, with 82±5.4% of vacuoles  
181 with intact mitochondrion after treatment, which increased to 91.5±5.2% upon drug  
182 removal, although these effects did not meet statistical significance (Fig. 1C). Upon  
183 pyrimethamine treatment 60.3±17.0% of parasites had aberrant mitochondrial  
184 morphology. As this level did not change with statistical significance upon removal of  
185 drug (75.5±16.2%), the disruption of the mitochondrion observed is likely the  
186 consequence of parasite death and not the temporary and reversible rearrangement  
187 seen with monensin and atovaquone. Taken together, reversible mitochondrial  
188 disruption does not appear to be a generalized mechanism for responding to stress  
189 induced via drug challenge. Moreover, *Toxoplasma* possesses the capacity for  
190 reversible mitochondrial rearrangement in response to specific drug-induced stress.

### 191 **A fission protein homolog localizes to the outer mitochondrial membrane.**

192 The most striking aspect of monensin treatment in *Toxoplasma* is the disruption of  
193 mitochondrial morphology, producing what appears to be a fragmented organelle. A  
194 survey of the *Toxoplasma* database (ToxoDB) to identify homologs involved in  
195 mitochondrial dynamics revealed that the genome of *Toxoplasma* is rather bereft of  
196 proteins that participate in the fusion and fission processes. However, we were able to  
197 identify a protein (TGGT1\_263323) with homology to the fission 1 (Fis1) protein from  
198 higher eukaryotes. TGGT1\_263323, referred to hereafter as Fis1, is a 154 amino acids  
199 protein and contains two tetratricopeptide (TPR) domains, a C-terminal transmembrane

200 (TM) domain followed by a three amino acid C-terminal sequence (CTS). In previous  
201 work focused on the characterization of membrane anchor domains in *Toxoplasma* we  
202 showed through transient transfection of an N-terminal HA tagged Fis1 that it localized  
203 to the mitochondrion (24). In order to further characterize the localization and function of  
204 Fis1, we established a parasite strain stably expressing an N-terminally HA epitope-  
205 tagged version of Fis1 (Fig. 2A). Immunofluorescence assay (IFA) of intracellular  
206 parasites of this strain (RH $\Delta$ *hpt*+HAFis1) confirmed that Fis1 localized to the parasite  
207 mitochondrion by co-localization with F<sub>1</sub>B ATPase protein, which is located in the inner  
208 mitochondrial membrane (IMM) (Fig. 2B). Super-resolution imaging shows that the Fis1  
209 signal envelops the signal from F<sub>1</sub>B ATPase (Fig. 2C). This strongly suggests that, as  
210 expected for Fis1 proteins, Fis1 localizes to the outer mitochondrial membrane.

211 Since we had observed mitochondrial fragmentation following monensin treatment,  
212 we next sought to examine whether drug challenge resulted in altered localization of  
213 Fis1. RH $\Delta$ *hpt*+HAFis1 parasites were treated for 8 hours with monensin and prepared  
214 for super-resolution imaging. As anticipated, we observed fragmented mitochondrial  
215 morphology when examining the localization of F<sub>1</sub>B ATPase (Fig. 2D). Some of the  
216 mitochondrial fragments were encircled by the Fis1 protein, as one would expect for a  
217 protein in the OMM (Fig. 2D). Importantly, we also identified mitochondrial fragments  
218 that appeared to be connected by filaments of Fis1 (white arrowheads, Fig. 2D). These  
219 super-resolution images revealed that the OMM remains intact following the 8-hour  
220 monensin treatment despite the punctate appearance of the IMM. Thus, the observed  
221 effect of monensin treatment on mitochondrial morphology is not a true fragmentation  
222 but rather a constriction of the OMM in particular regions.

223 **The Fis1 transmembrane domain is required for proper localization to the OMM.**

224 Our previous studies have shown that the TM domain of Fis1 is sufficient for  
225 mitochondrial targeting (24). To determine whether the TM is necessary for  
226 mitochondrial localization we established a parasite strain expressing an exogenous  
227 copy of Fis1 with an N-terminal HA tag and truncated at the C-terminus as to lack the  
228 TM and CTS (Fig. 3A). Intracellular parasites of this strain were co-stained with  
229 antibodies against HA to detect Fis1 $\Delta$ TM and against F<sub>1</sub>B ATPase to visualize the  
230 mitochondrion (Fig. 3B). Fis1 lacking the TM appears to be distributed throughout the  
231 cytoplasm in a punctate pattern (Fig. 3B). A similar result was observed when the TM of  
232 the endogenous Fis1 was replaced by an HA epitope tag using homologous  
233 recombination (Fig. 3C and D). Eliminating the TM of the endogenous Fis1 shifted its  
234 localization from the mitochondrion to the cytoplasm. Thus, proper Fis1 localization to  
235 the OMM is dependent on its C-terminal transmembrane domain and CTS.

236 **Mitochondrial morphology is altered by the mislocalization of Fis1.**

237 When analyzing the localization of the truncated endogenous Fis1 we noted that the  
238 morphology of the mitochondrion appeared abnormal. Instead of the typical lasso seen  
239 in wildtype parasites (Figs. 1 and 2), the mitochondrion in parasites of the  
240 RH $\Delta$ *ku80*:Fis1 $\Delta$ TM strain appeared to contain additional branches as well as  
241 unconnected strands, a phenotype that seemed to increase as the parasites underwent  
242 several rounds of division (Fig. 3D). In the RH $\Delta$ *ku80*:Fis1 $\Delta$ TM strain, 60.4 $\pm$ 7.5% of  
243 vacuoles had parasites with atypical mitochondrion (i.e. extraneous branches and  
244 strands). This is in contrast to the parental strain in which only 12.7 $\pm$ 3.4% of vacuoles

245 had parasites with atypical mitochondrion (Fig. 3D). These observations suggest that  
246 mislocalizing the endogenous Fis1 alters the typical mitochondrial morphology.

247 **RH $\Delta$ ku80:Fis1 $\Delta$ TM parasites are less susceptible to monensin-induced**  
248 **mitochondrial disruption.**

249 The Fis1 protein in higher eukaryotes is responsible for fission of stressed and  
250 damaged mitochondria in order to maintain a healthy organelle pool. Thus, we next  
251 sought to determine the effect of Fis1 mislocalization in parasites undergoing monensin  
252 drug challenge. Parasites were vehicle treated or monensin treated for 12 hours.  
253 Cultures were fixed and examined by immunofluorescence microscopy and vacuoles  
254 with fragmented F<sub>1</sub>B ATPase signal were tallied. In the absence of any treatment the  
255 percentage of parasites with punctate F<sub>1</sub>B ATPase staining was statistically similar  
256 between parental and mutant strain (18.6 $\pm$ 12.4% vs. 23.8 $\pm$ 17.2). Following monensin  
257 treatment of parental parasites, an increase from 18.6 $\pm$ 14.8% to 67.6 $\pm$ 10.5% punctate  
258 mitochondria was observed for the parental strain (Fig. 4A). In RH $\Delta$ ku80:Fis1 $\Delta$ TM  
259 parasites, an increase from 23.8 $\pm$ 17.2 to 51.0 $\pm$ 9.3% punctate mitochondria was  
260 recorded after drug challenge (Fig. 4A). The percent increase between the vehicle and  
261 monensin treated parasites was determined, and the increase in punctate mitochondria  
262 was statistically greater for the parental parasites compared to the RH $\Delta$ ku80:Fis1 $\Delta$ TM  
263 parasites, 49.0 $\pm$ 6.1% versus 27.2 $\pm$ 9.6, respectively (Fig. 4B).

264 The phenotypes observed with the RH $\Delta$ ku80:Fis1 $\Delta$ TM parasites could be due to  
265 either absence of Fis1 at the mitochondrion or a dominant negative effect from the  
266 mislocalized truncated protein. To differentiate between these possibilities, we next  
267 sought to determine how genetic ablation of Fis1 would affect the parasite's ability to

268 respond to monensin challenge and undergo mitochondrial remodeling. Employing the  
269 CRISPR/Cas9 system, *RHΔhpt+HAFis1* parasites ectopically expressing the N-  
270 terminally HA epitope-tagged Fis1 were either transfected with a sgRNA that would  
271 target both the endogenous and exogenous Fis1 gene or a sgRNA for the non-essential  
272 uracil phosphoribosyltransferase (UPRT) gene as a control. Parasites were immediately  
273 infected into human foreskin fibroblasts (HFFs) on coverslips and grown in culture for 16  
274 hours. Infected cultures were then vehicle or monensin treated for 12 hours. After  
275 treatment parasites were fixed and IFA was performed staining for HA to detect Fis1  
276 and F<sub>1</sub>B ATPase to visualize the mitochondrion (Supplemental figure S1). We then  
277 compared the mitochondrial morphology in Fis1 sgRNA transfected parasites lacking  
278 HA signal to that of control sgRNA transfected parasites with HA signal. To control for  
279 the effects of Cas9, which is fused to GFP (25), we only analyzed the mitochondrial  
280 morphology in parasites with nuclear GFP signal. In vehicle treated parasites, there was  
281 no significant difference between parasites lacking HA-tagged Fis1 expression and  
282 those targeted for the UPRT when compared to the control parasites still expressing  
283 Fis1 (Fig. 4C and Supplemental figure S1). Interestingly, in contrast to what we  
284 observed with mislocalized Fis1, complete lack of Fis1 did not affect the mitochondrial  
285 morphology. Thus, it appears that Fis1 lacking the TM domain imparts a dominant  
286 negative effect on mitochondrial morphology.

287 As expected, monensin treatment of the Cas9/sgrNA transfected parasites resulted  
288 in an increase in the number of vacuoles containing punctate F<sub>1</sub>B ATPase signal.  
289 Control non-transfected parasites and those transfected with the UPRT sgRNA  
290 possessed 83.3±12.8% and 88.8±7.7% punctate mitochondria, respectively (Fig. 4C).

291 However, parasites lacking the HA-tagged Fis1 signal displayed significantly fewer  
292 vacuoles with disrupted mitochondria upon monensin treatment, comprising only  
293  $50.5\pm 16.9\%$  of the vacuoles (Fig. 4C). The percent increase in the number of vacuoles  
294 with punctate mitochondria for the parasites deficient in HA-tagged Fis1 expression was  
295 significantly lower than for either control parasite populations,  $23.9\pm 17\%$  versus  
296  $63.3\pm 16.8\%$  and  $77.8\pm 10.2\%$ , respectively (Fig. 4D). Two-way Anova analysis indicated  
297 that there was both a treatment and genotype effect and that the effects interact.  
298 Overall, these data indicate that complete lack of Fis1 does not affect mitochondrial  
299 morphology in untreated parasites but significantly decreases monensin-induced  
300 mitochondrial remodeling, indicating that Fis1 is partially required for constriction of the  
301 IMM in response to treatment with the ionophore.

### 302 **A putative Fis1 interactor localizes to the OMM**

303 Mislocalization of the endogenous Fis1 results in a dominant negative phenotype  
304 in terms of mitochondrial morphology. We hypothesize that this is the result of  
305 mislocalization of Fis1 interactors required at the mitochondrion for normal morphology.  
306 To identify these potential interactors, we employed a Yeast Two-Hybrid (Y2H)  
307 interaction screen. Using full-length Fis1 as bait, 46 million clones were screened for  
308 Y2H interaction and 247 were selected for identification. The putative interactors were  
309 then given a confidence score based on the likelihood of interaction with Fis1 (26, 27).  
310 This resulted in 24 potential interactors with a global Predicted Biological Score (PBS)  
311 from A (highest confidence) to D (lowest confidence) (26, 27) (Table 1). To narrow down  
312 the list we immunoprecipitated the exogenous HA tagged Fis1 using HA conjugated  
313 beads and analyzed the precipitated complex by mass spectroscopy. As a control, we

314 used the parental RH $\Delta$ *hpt* strain, which does not express the hemagglutinin tag.  
315 Through this analysis, we identified 11 putative interactors that had at least 5 peptides  
316 in the Fis1 sample and no peptides in the control sample (Table S1 in supplemental  
317 material). Among these only one was also identified in the Y2H interaction screen,  
318 TGGT1\_265180.

319 To determine the localization of TgGT1\_265180, we introduced a C-terminal myc  
320 epitope tag to the endogenous gene. IFA assays of the resulting strain show that, like  
321 Fis1, TgGT1\_265180 is localized to the mitochondrion of intracellular parasites (Fig.  
322 5A). This association with the mitochondrion persists during parasite division (Fig. 5B).  
323 To determine whether the protein is associated with the outside or inside of the  
324 mitochondrion we performed IFA after permeabilization with various concentrations of  
325 digitonin using detection of F<sub>1</sub>B ATPase to monitor mitochondrial permeabilization (Fig.  
326 5C). When using 0.01% digitonin we can detect both F<sub>1</sub>B ATPase and TgGT1\_265180  
327 (Fig. 5C). By contrast, using 0.005% digitonin allows for detection of TgGT1\_265180 but  
328 not F<sub>1</sub>B ATPase, which suggest that TgGT1\_265180 likely associates with the OMM  
329 and faces the cytoplasm of the parasite (Fig. 5C). Association with the OMM was  
330 confirmed by treatment with monensin. After treating TgGT1\_265180(myc) expressing  
331 parasites with monensin, we observed a similar pattern to that of Fis1 in which  
332 fragments containing the IMM marker F<sub>1</sub>B ATPase are surrounded and connected by  
333 TgGT1\_265180 (Fig. 5D). Thus, TgGT1\_265180 localizes to the OMM as expected for  
334 a *bona fide* interactor of Fis1.



### 335 **Localization of TgGT1\_265180 is partially dependent on proper Fis1 localization**

336 Despite its association with the OMM, TgGT1\_265180 has no predicted trans-  
337 membrane domains or posttranslational modifications that would suggest membrane  
338 interaction. Therefore, we hypothesize the localization of TgGT1\_265180 occurs via  
339 protein-protein interaction. To test this idea, we transfected parasites with an ectopic  
340 copy of either full length or truncated TgGT1\_265180 carrying a C-terminal HA epitope  
341 tag and under the control of the TgGT1\_265180 promoter (Fig. 6A). The truncated form  
342 lacks the C-terminal 92 amino acids, which represent the region of the protein that was  
343 identified through the Y2H screen as interacting with Fis1, referred to as the Selected  
344 Interaction Domain (SID). As expected, the full-length ectopic copy localized to the  
345 mitochondrion (Fig. 6A). However, deletion of the SID resulted in the mislocalization of  
346 the protein to the cytoplasm (Fig. 6A). These data indicate that the C-terminal SID is  
347 necessary for proper mitochondrial localization.

348 To investigate if localization of TgGT1\_265180 to the mitochondrion is through an  
349 interaction with Fis1, we added a myc epitope tag to the endogenous TgGT1\_265180 in  
350 the strain in which Fis1 lacks its TM (RH $\Delta$ ku80:Fis1 $\Delta$ TM) and is mislocalized to the  
351 cytoplasm. In this strain, TgGT1\_265180 does not colocalize with the mislocalized Fis1  
352 but appears to accumulate towards the basal end of the parasites in a pattern that does  
353 not resemble normal mitochondrial localization (Fig. 6B). To further analyze the  
354 localization of TgGT1\_265180 in the RH $\Delta$ ku80:Fis1 $\Delta$ TM parasite line, we co-stained for  
355 F<sub>1</sub>B ATPase (Fig. 6C). While we observed some overlap between the TgGT1\_265180  
356 and F<sub>1</sub>B ATPase signals, TgGT1\_265180 was also detected away from the  
357 mitochondrion (Fig. 6C). Interestingly, we observed that the TgGT1\_265180(myc)

358 signal, as detected through IFA, appeared to be much weaker in the *Fis1* $\Delta$ TM strain  
359 than in the parental one (Fig. 6C). To quantitate this observation, we performed  
360 Western blots from both strains probing for TgGT1\_265180(myc) (Fig. 6D). This  
361 analysis corroborated that indeed the levels of endogenous TgGT1\_265180 are  
362 significantly reduced when *Fis1* is mislocalized away from the mitochondrion (Fig. 6D).  
363 We quantitated the levels of TgGT1\_265180 in both strains with densitometry of three  
364 independent Western blots using the surface antigen SAG1 as a loading control and  
365 determined that the level of TgGT1\_265180 in the *RH* $\Delta$ *ku80*:*Fis1* $\Delta$ TM is 23.2 $\pm$ 8.7% of  
366 that in the parental strain. In conjunction, these results indicate that TgGT1\_265180  
367 associates with the mitochondrion via its C-terminus and that its localization and stability  
368 is at least in part dependent on *Fis1*.

### 369 **265180 knockout affects parasite fitness in tissue culture**

370 Based on a genome-wide CRISPR screen, TgGT1\_265180 was assigned a relative  
371 fitness phenotype score of -1.65, which indicates that, while its absence would  
372 negatively affect parasite fitness, it is likely not essential, making its genetic disruption  
373 possible (28). Accordingly, we employed double homologous recombination to replace  
374 the coding sequence of TgGT1\_265180 with a drug selection marker (Fig. 7A). Proper  
375 integration of the knockout construct in stably transfected clones was confirmed using  
376 PCR (Fig. 7B). To test the effect of the knockout on parasite propagation we used a  
377 standard growth assay in which the same number of either parental or mutant parasites  
378 were allowed to infect human fibroblasts and form plaques over a five-day period. We  
379 observed a significant propagation defect in the  $\Delta$ 265180 parasites, exhibited by both  
380 less and smaller plaques in comparison to the parental strain. To quantitate this defect,

381 we counted the number of plaques formed by the parental and knockout strains in three  
382 separate experiments each with experimental triplicates (Fig. 7C). The average number  
383 of plaques by the  $\Delta 265180$  was  $30.2 \pm 9.0\%$  of that detected for the parental strain.

384 To confirm that the phenotype observed was due to the disruption of the target gene  
385 and not a secondary effect, we complemented the  $\Delta 265180$  strain with an exogenous  
386 copy of the TgGT1\_265180 cDNA including a C-terminal HA epitope tag and driven by  
387 its own promoter. As the knockout strain lacks Ku80 and does not effectively allow for  
388 random integration, the exogenous copy was directed to the remnants of the Ku80 locus  
389 using CRISPR/Cas9. In addition to complementing with the wildtype TgGT1\_265180,  
390 we transfected the knockout strain with the truncated version TgGT1\_265180 $\Delta$ SID,  
391 which does not localize to the mitochondrion (Fig. 7D). Western blot showed that both  
392 complemented strains expressed proteins of the expected size (Fig. 7E). Interestingly,  
393 while the wildtype complement expression level is similar to that of the endogenous  
394 levels, the truncated copy appears to be expressed at a much higher level (Fig. 7E).  
395 Plaque assays of both the  $\Delta 265180+265180$ (HA) and  $\Delta 265180+265180\Delta$ SID(HA)  
396 strains were performed in parallel to the knockout strain (Fig. 7F). The average number  
397 of plaques by the  $\Delta 265180+265180$ (HA) was  $64.5 \pm 15.8$ , which is significantly higher  
398 than both the knockout and truncated complement strains (Fig. 7F).  
399  $\Delta 265180+265180\Delta$ SID(HA) had a lower average number of plaques ( $21.6 \pm 8.0$ ) than  
400 that of the knockout ( $38.8 \pm 15.3$ ), but this difference was not statistically significant.  
401 These results indicate that proper localization of TgGT1\_265180 is necessary to rescue  
402 the growth phenotype seen in tissue culture.

403 **265180 disrupts the normal morphology of the mitochondrion.**

404 As TgGT1\_265180 is associated with the mitochondrion we assessed mitochondrial  
405 morphology in the knockout parasites. In intracellular parasites, the mitochondrion  
406 maintains what is referred to as a lasso shape that abuts the periphery of the parasite  
407 (17) (Figs. 2 and 8A). However, based on staining with antibodies against F<sub>1</sub>B ATPase,  
408 the mitochondrion of  $\Delta 265180$  parasites exhibit an altered mitochondrial morphology,  
409 with the bulk of the mitochondrial material concentrated at one end of the parasite (Fig.  
410 8A). By contrast disruption of TgGT1\_265180 did not affect the morphology of the  
411 apicoplast, rhoptries, or endoplasmic reticulum (Fig S2). Introduction of the wild type  
412 TgGT1\_265180 to the knockout strain complements the mitochondrial phenotype (Fig.  
413 8B). In contrast, the truncated TgGT1\_265180 $\Delta$ SID, which is not localized to the  
414 mitochondrion, does not rescue the collapsed mitochondrion phenotype (Fig. 8C). The  
415 phenotype of the knockout and the complemented strains was quantitated by  
416 determining the percentage of parasites with normal and abnormal mitochondrion  
417 morphology. Normally, the *Toxoplasma* mitochondrion retracts from the periphery of the  
418 parasite during egress and changes its morphology to what has been described as  
419 sperm-like and collapsed (17). Interestingly, we observed all three morphologies  
420 normally associated with extracellular parasites (lasso, sperm-like, and collapsed) in  
421 intracellular parasites of the  $\Delta 265180$  strain (Fig. 9A). With the parental strain, the  
422 proportion of mitochondrial morphologies in intracellular parasites is  $84.7 \pm 2.1\%$  lasso,  
423  $15.3 \pm 2.1\%$  sperm-like, and  $0\%$  collapsed. By contrast, intracellular parasites of the  
424  $\Delta 265180$  strain, the mitochondrial distribution is  $6.0 \pm 2.6\%$  lasso,  $50.0 \pm 2\%$  sperm-like,  
425 and  $44.0 \pm 4.4\%$  collapsed (Fig. 9B). Just as it was the case for the plaquing phenotype,

426 introduction of a wild type copy of TgGT1\_265180 partly rescues the morphological  
427 phenotype with  $48.5\pm 4.4\%$  of parasites exhibiting lasso-shaped mitochondrion,  
428  $49.2\pm 3.9\%$  sperm-like, and only  $2.3\pm 0.6\%$  collapsed. Additionally, the truncated copy  
429 had a similar morphological distribution to that of the knockout strain ( $2.7\pm 2.3\%$  lasso,  
430  $56.0\pm 10.1\%$  sperm-like, and  $41.4\pm 12.4\%$  collapsed) and was significantly different from  
431 the distributions of the parental and complement strains, which is consistent with  
432 defects seen in plaquing (Fig. 9B). Thus, TgGT1\_265180 plays a crucial role in  
433 maintaining proper morphology of the mitochondrion. Consequently, we have dubbed  
434 this new gene Lasso Maintenance Factor 1 (LMF1).

### 435 **Disruption of LMF1 results in defects in mitochondrial segregation between** 436 **daughter parasites**

437 During our analysis of mitochondrial morphology in the LMF1 mutant strain we  
438 noted various aberrant phenotypes that likely relate to parasite and mitochondrial  
439 division. *Toxoplasma* divides through a process called endodyogeny, where two  
440 daughter parasites form within a mother parasite (29). This results in a doubling in the  
441 number of parasites in a vacuole after each round of replication. We noted that vacuoles  
442 of the LMF1 strain often had abnormal number of parasites (i.e. not 2, 4, 8, etc). We  
443 found that approximately  $25.3\pm 5.1\%$  of vacuoles in  $\Delta 265180$  parasites had odd  
444 numbers compared to  $5.8\pm 2.9\%$  in wildtype parasites and  $13.7\pm 3.1\%$  in the  
445 complemented strain (Fig. 10A). Interestingly, we also noticed numerous vacuoles in  
446 which some parasites lacked a mitochondrion based on absence of F<sub>1</sub>B ATPase  
447 staining (Fig. 10B, white arrows). When quantified,  $16.2\pm 4.0\%$  of vacuoles contained at  
448 least one parasite that did not have mitochondrial material compared to  $0.3\pm 0.6\%$  of

449 RH $\Delta ku80$  parasites were amitochondriate (Fig. 10B). As with the other phenotypes,  
450 exogenous expression of wildtype LMF1 complemented the phenotype with  $6.0 \pm 1.7\%$  of  
451 vacuoles containing amitochondriate parasites. In addition to amitochondriate parasites,  
452 disruption of LMF1 also results in an accumulation of mitochondrial material outside of  
453 parasites (Fig. 10C, white arrows). We determined that  $30.9 \pm 4.0\%$  of vacuoles had  
454 extraparasitic mitochondrial material, which is three times greater than that of the  
455 parental parasite line ( $10.6 \pm 3.2\%$ ). Interestingly, this particular phenotype was not  
456 complimented, as  $28.3 \pm 2.1\%$  of  $\Delta 265180+265180(\text{HA})$  vacuoles contained  
457 extraparasitic material (Fig. 10C).

458 We hypothesize that these phenotypes (abnormal number of parasites,  
459 amitochondriate parasites, and extraparasitic mitochondria) are the result of aberrant  
460 segregation of the mitochondrion into the daughter cells during endodyogeny.  
461 Accordingly, we co-stained parental and knockout parasites for acetylated tubulin to  
462 detect daughter cells and for F<sub>1</sub>B ATPase to monitor the mitochondrion (Fig. 11). During  
463 the early (E) stages of division, wildtype parasite mitochondria surround the forming  
464 daughters (Fig. 11A top panel). As endodyogeny progresses to an intermediate (I)  
465 stage, the mitochondrion remains excluded from the daughters (Fig. 11A middle panel).  
466 When the daughters have almost fully formed (late (L) stages), branches of mother  
467 mitochondria incorporate into the daughter parasites before emerging from the mother  
468 (Fig. 11A bottom panel). When LMF1 is disrupted, the mitochondrion does not have the  
469 typical lasso shape and appears to associate with one of the two daughters instead of  
470 surrounding both (Fig. 11B top panel, E). As the daughters continue to form in the LMF1  
471 deficient parasites, the mitochondrial material remains associated with one daughter or

472 is completely excluded from the budding daughters (Fig. 11B second panel, I). During  
473 the final stages of endodyogeny, some daughters seem to have received mitochondrial  
474 material, whereas others have not. This correlates to an accumulation of mitochondrial  
475 material outside of the parasites (Fig. 11B bottom three panels, L). Therefore, disruption  
476 of LMF1 leads to defects in mitochondrial segregation during endodyogeny, which  
477 agrees with the aberrant phenotypes observed with mitochondrial shape and  
478 localization (Figs. 9 and 10).

## 479 **DISCUSSION**

480           The single mitochondrion of the pathogen *Toxoplasma gondii* is highly dynamic,  
481 with its location and structure changing during various stages of the parasite's lytic  
482 cycle. As the last organelle to move from a live mother parasite into two nascent  
483 daughter cells, the morphology and position of the mitochondrion is tightly regulated  
484 during parasite division. Similarly, as the parasite moves from inside to outside host  
485 cells the mitochondrion morphology dramatically changes. While inside the host cell  
486 *Toxoplasma's* mitochondrion forms a lasso with multiple points of contact with the  
487 parasite pellicle, then quickly retracts from the parasite periphery to a collapsed bundle  
488 at the apical end as the parasites move to the extracellular space. In this study, we  
489 show that the mitochondrial morphology also changes under treatment with the anti-  
490 parasitic drugs atovaquone and monensin. Under drug treatment the mitochondrion's  
491 outer membrane becomes constricted causing the inner mitochondrial material to  
492 appear punctate. Importantly, this phenomenon is completely reversible and upon  
493 removal of monensin the mitochondrion returns to its typical shape. We also show that  
494 mitochondrial constriction upon monensin treatment is in partly dependent on the  
495 presence of the fission protein Fis1 at the mitochondrion. Thus, we have discovered a  
496 mechanism by which the parasite reversibly restructures its mitochondrion.

497           The morphological changes experienced by the mitochondrion under monensin  
498 treatment are likely a response to stress and might represent a mechanism by which the  
499 parasite protects the mitochondrion from irreversible damage. Mitochondria from  
500 numerous organisms alter their morphology to respond to specific stressors, such as  
501 UV radiation and nutrient starvation (30–33). In conditions that damage mitochondrial



502 DNA, such as cycloheximide and UV radiation, mitochondria hyperfuse (30). This  
503 phenomenon most likely occurs to complement damaged mitochondrial DNA and  
504 promote DNA mixing, and is dependent on mitochondrial fusion factors such as OPA1  
505 and Mfn1/2 (30). Conditions that affect mitochondrial respiration, such as oligomycin  
506 and uncoupling agents, cause mitochondrial fragmentation (32, 33). Nutrient conditions  
507 also play a role in mitochondrial morphology. For example, yeast cultured in aerobic,  
508 respiratory conditions have more punctate mitochondria whereas anaerobic conditions  
509 result in branched and elongated morphologies (31). The smaller, more punctate  
510 mitochondria have higher surface area than those with branched morphology, indicating  
511 a higher respiratory capacity (31). Constriction of the inner mitochondrial membrane is a  
512 priming event for mitochondrial division and can be augmented by changes in  $Ca^{2+}$   
513 levels, producing a “beads-on-a-string” phenotype similar to that observed with  
514 monensin. These data suggest that mitochondrial morphology is dependent upon  
515 environmental conditions and stressors. Therefore, the phenotype we see under  
516 monensin treatment is likely a protective mechanism for the mitochondrion against the  
517 effects of the ionophore.

518         As the effect of monensin is a reversible constriction along the outer  
519 mitochondrial membrane, we hypothesize that this phenomenon would require the  
520 mitochondrial fission machinery. The yeast mitochondrial fission machinery is the most  
521 well characterized and it is comprised of the membrane anchored protein Fis1p, which  
522 actively recruits other proteins to the mitochondria during fission like Mdv1  
523 (mitochondrial division protein 1), which acts as an adapter protein. Fis1p is then able to  
524 recruit a GTPase, dynamin (Dmn1), which is able to drive the final scission of the

525 mitochondrion (11). No homologs for Mdv1 have been found in *Toxoplasma gondii*, but  
526 there are one Fis1 homolog (TGGT1\_263323) and three dynamin-related proteins:  
527 DrpA, DrpB, and DrpC. Of these, DrpC, which lacks many of the features required for  
528 Drp function, has been associated with mitochondrial division (14). Nonetheless, we and  
529 other groups have shown that instead DrpC appears to be involved in vesicle trafficking  
530 and endocytosis (14, 15). As the strongest homolog of any putative fission protein in  
531 *Toxoplasma* we investigated the role of Fis1 in monensin driven mitochondrial  
532 rearrangement. We found that Fis1 localization to the mitochondrion is important for  
533 monensin-induced remodeling and the absence of Fis1 results in decreased sensitivity  
534 to the ionophore. Thus, it is plausible that Fis1 is recruiting proteins to the mitochondrion  
535 outer membrane during monensin treatment to induce a transient constriction, similar to  
536 the transient interaction Fis1 has with Drp1 (34, 35). As DrpC and Fis1 do not seem to  
537 interact and DrpC localization does not change upon monensin treatment it is unlikely  
538 that DrpC is involved in this process. Interactome analysis of Fis1 identified some  
539 proteins with domains of interest that are also found in Fis1 interactors of other systems.  
540 For example, TGGT1\_224270 contains WD40-like domains, which is common to the  
541 Fis1 adaptor proteins (34, 36). TGGT1\_304990 is a guanylate-binding protein that may  
542 be able to take the role of a dynamin-related protein in this system.

543 While in yeast Fis1 is essential, mammalian cells appear to have several proteins  
544 able to recruit the fission machinery, which makes Fis1 dispensable in those organisms.  
545 Knockout of *Toxoplasma* Fis1 does not disrupt mitochondrial morphology (16) or affect  
546 parasite fitness (16, 28). These results are corroborated by our experiments in which  
547 the endogenous Fis1 gene was disrupted through CRISPR/Cas9 (Fig S1). Interestingly,

548 we do observe a significant defect in the morphology of the mitochondrion when the  
549 endogenous Fis1 is mislocalized to the cytoplasm by deleting its transmembrane  
550 domain. In both mammalian cells and in yeast, either mislocalization or overexpression  
551 of Fis1 results in disruption of mitochondrial morphology (34, 37). In *Toxoplasma*,  
552 mislocalization of Fis1 resulted in aberrant mitochondrial morphology in which they  
553 maintain their lasso shape, but it is stretched out and appears to have strenuous  
554 branches and material. The phenotype observed with mislocalized Fis1 could be the  
555 consequence of Fis1 interacting with proteins that it would normally not come into  
556 contact with or of Fis1 pulling proteins away from the mitochondrial membrane where  
557 they are required. With this in mind we performed a yeast two hybrid screen to identify  
558 putative interactors. Interestingly, among the 24 proteins identified, seven  
559 (TGGT1\_215520, TGGT1\_218560, TGGT1\_265180, TGGT1\_246720, TGGT1\_304990,  
560 TGGT1\_321370, and TGGT1\_321450) likely localize to the mitochondrion, based on a  
561 proteomic analysis of the *Toxoplasma* mitochondrion, which uses both \*BirA (38) and  
562 APEX (39, 40) to identify novel mitochondrial proteins (41). Nonetheless, this proteome  
563 may not contain all the potential interactors that localize to the mitochondrion because  
564 the proteome was generated using a mitochondrial matrix protein, HSP70, thus  
565 excluding proteins that are localized to the outer mitochondrial membrane. *In silico*  
566 analysis of the putative Fis1 interactors using MitoProt, SignalP, and PSort (42–44)  
567 shows that an additional 5 proteins (TGGT1\_226050, TGGT1\_237015,  
568 TGGT1\_247700, TGGT1\_299670, and TGGT1\_286470) may also localize to the  
569 mitochondrion based on the presence of mitochondrial signal. Another protein of  
570 interest is TGGT1\_287980 has a forkhead-associated (FHA) domain, which is involved

571 in a number of regulatory and signaling processes (45). Further characterization of  
572 these proteins is needed to determine what role they may play in mitochondrial  
573 remodeling and dynamics.

574 In this study, we focused on one of the putative Fis1 interactors,  
575 TGGT1\_265180, which we have dubbed LMF1. This protein was the only to be  
576 identified through both the Y2H and a small-scale co-immunoprecipitation assay. LMF1  
577 localizes to the OMM despite the absence of any domain or modification that would  
578 predict mitochondrial or membrane localization, suggesting that its association with the  
579 mitochondrion is likely through protein-protein interactions. When Fis1 is mislocalized to  
580 the cytoplasm, LMF1 expression is significantly reduced and while some LMF1 is still  
581 deposited on the mitochondrion, other remnants do not appear to be associated with the  
582 organelle. LMF1 may not colocalize with Fis1 in these parasites because either protein  
583 may be interacting with other proteins or membranes. In the case of LMF1, there are  
584 potentially redundant interactors on the mitochondrial surface or interactors localized to  
585 other parts of the parasite, like the IMC, that are important for maintaining the  
586 mitochondrial lasso shape. Additionally, the expression level of LMF1 is decreased  
587 significantly when Fis1 is mislocalized, which may be due to either a decrease in the  
588 transcript level of LMF1 or that the protein is being degraded in the absence of  
589 potentially stabilizing Fis1 interactions.

590 Genetic disruption of LMF1 reveals its unexpected role in maintenance of  
591 mitochondrial morphology in intracellular parasites. LMF1 knockout results in loss of the  
592 typical lasso arrangement with the majority of parasites having either sperm-like or  
593 collapsed mitochondria. Thus, it appears that in the absence of LMF1 the mitochondrion

594 of intracellular parasites adopts morphology normally only seen in extracellular ones.  
595 These mitochondrial morphologies, sperm-like and collapsed, are proposed to be due to  
596 a retraction of the mitochondrion from the IMC as the parasite transitions to the  
597 extracellular environment. Therefore, it is possible that elimination of LMF1 has also  
598 eliminated these contact sites, causing a significant decrease in parasites with lasso  
599 morphology intracellularly. Membrane contact sites (MCSs) play important roles in  
600 signaling, lipid and ion exchange between organelles, and proper organelle positioning  
601 (46, 47). Whether any of these processes are affected in the LMF1 mutant strain is yet  
602 to be investigated. Nonetheless, the fact that parasites lacking LMF1 exhibit a  
603 propagation defect suggest that the proper morphology of the mitochondrion is  
604 important for parasite fitness.

605 We noted that complementation of the knockout strain with the wildtype LMF1  
606 was incomplete. While the exogenous copy was under the control of the *LMF1*  
607 promoter, it is possible that the expression level from the ectopic site is not at the right  
608 level for complete complementation. Another possibility is that, in order to adapt to the  
609 lack of LMF1, the expression of other factors required for mitochondrial morphology was  
610 affected. Therefore, when the wildtype construct was introduced, it was missing other  
611 interactors that are necessary to fully attach the mitochondrion to the periphery. Future  
612 experiments using conditional knockout of LMF1 provide a better controlled system to  
613 study this mechanism.

614 Altering mitochondrial morphology is important in many systems to accommodate  
615 energetic needs and change positioning of organelles to perform specific functions. For  
616 example, mitochondria in lymphocytes concentrate towards the leading edge and alter

617 their morphology to allow for chemotaxis to the site of injury (48). *Trypanosoma brucei*  
618 is another parasite that contains a single mitochondrion that alters its shape in different  
619 life stages (49). During the procyclic phase in the tsetse fly midgut, the mitochondrion  
620 elongates to form an elaborate network of mitochondrial branches. In the bloodstream  
621 form, the branches collapse to form one tubule that lacks the respiratory capability of  
622 the procyclic stage. This mitochondrial morphology change is dependent on a protein  
623 called TbLOK1, which is naturally downregulated in the bloodstream form (49). Based  
624 on this knowledge, it is possible that the retraction from the IMC toward the apical end  
625 of the parasite during extracellular stress is to a) position the mitochondrion to the area  
626 of greatest energetic need and/or b) accommodate to the available nutrients. We  
627 propose that LMF1 interacts with Fis1 on the OMM and another or multiple proteins in  
628 the parasite pellicle to establish membrane contact sites to maintain the typical lasso  
629 shape. Upon egress, LMF1 or its interactors is either post-translationally modified or  
630 downregulated as to eliminate these contact sites and position the mitochondrion  
631 towards the apical end. Once the parasite has reentered a host cell, the mitochondrion  
632 can then reattach to the pellicle and can extend to the parasite periphery. LMF1  
633 knockout parasites cannot properly form this lasso and therefore have given us an  
634 incredible tool to study the functional relevance of the mitochondrial morphodynamics  
635 and to identify the key players in this process.

## 636 **EXPERIMENTAL PROCEDURES**

### 637 *Host cell and parasite maintenance*

638 All parasite strains were maintained via continued passage through human foreskin  
639 fibroblasts (HFF, purchased from ATCC) in normal growth medium, which consisted of  
640 Dulbecco's modified Eagle's medium (DMEM) supplemented with 10% fetal bovine  
641 serum (FBS), 2 mM L-glutamine, and 100 units penicillin/100 $\mu$ g streptomycin per mL. All  
642 cultures were grown in a humidified incubator at 37°C and 5% CO<sub>2</sub>. Parasites used  
643 were of the strain RH lacking hypoxanthine-xanthine-guanine phosphoribosyl  
644 transferase (HPT, RH $\Delta$ *hpt*) (50) and RH lacking HPT and Ku80 (RH $\Delta$ *ku80* $\Delta$ *hpt*, referred  
645 to as  $\Delta$ *ku80* thereafter) (51, 52). For experiments involving drug treatment, the medium  
646 was supplemented with 1% FBS rather than 10%. For pyrimethamine treatment we  
647 used dialyzed serum. All drugs were purchased from Sigma. Stocks of monensin,  
648 pyrimethamine, and myxothiazol were prepared in ethanol, while atovaquone was  
649 prepared in DMSO.

### 650 *Generation of transgenic parasites*

651 Parasites were engineered to express ectopic copies of full-length Fis1  
652 (TGGT1\_263323) or a truncated version lacking the putative transmembrane (TM)  
653 domain. For this purpose, PCR was utilized to amplify the Fis1 cDNA and append a  
654 hemagglutinin (HA)-tag at the N-terminus. The amplicon was flanked by NsiI and PaeI  
655 restriction enzyme sites. Supplemental table S2 lists all the primers used throughout this  
656 study. Purified PCR fragments were inserted into the pHEX2 plasmid (53) using the In-  
657 Fusion HD Cloning Plus kit (Clontech). Expression of the transgenes was controlled by  
658 the *SAG1* promoter and selection was provided by the presence of the HPT selectable

659 marker (50). 35µg of KpnI-linearized plasmids were electroporated into parental RHΔ*hpt*  
660 parasites (54) and selection of parasites that successfully integrated the plasmid was  
661 achieved by growing parasites in medium containing 50µg mycophenolic acid and 50µg  
662 xanthine per mL. Three rounds of drug selection were followed by limited dilution  
663 cloning to establish HA-tag positive parasite lines with and without the transmembrane  
664 domain termed RHΔ*hpt*+HAFis1 and RHΔ*hpt*+Fis1ΔTM, respectively.

665 To generate a parasite line expressing an endogenous Fis1 lacking the TM  
666 (RHΔ*ku80*:Fis1ΔTM), a fragment of the Fis1 gene comprising the region just upstream  
667 of the TM and flanked by PacI and AvrII was PCR amplified from *Toxoplasma* genomic  
668 DNA and inserted into the pLIC-HA(3x)-DHFR plasmid (51) by In-Fusion cloning. 35µg  
669 of EcoRV-linearized plasmid was transfected into Δ*ku80* parasites (51). Resulting  
670 transfectants were selected for dihydrofolate reductase (DHFR) by growth in medium  
671 with 1µM pyrimethamine and cloned by limited dilution.

672 For C-terminal endogenous epitope tagging of TGGT1\_265180, a PacI-flanked  
673 fragment of TgGT1\_265180 just upstream of its stop codon was PCR amplified and  
674 inserted into pLIC-myc(3x)-DHFR by In-Fusion cloning. 60µg of XcmI-linearized plasmid  
675 was transfected into Δ*ku80* parasites and transfectants were selected for DHFR as  
676 described above.

677 Double homologous replacement of the TGGT1\_265180 coding sequence was  
678 used to establish a knockout strain. For this purpose, we generated a knockout  
679 construct using the previously described pminiGFP vector (55). Using In-Fusion cloning  
680 we introduced a 1,400bp PCR amplicon encompassing the region upstream of the  
681 TgGT1\_265180 start codon into the HindIII restriction site of pminiGFP and a 1,156bp



682 amplicon of the region downstream of the stop codon into the NotI restriction site. In this  
683 manner, the resulting vector (p265180\_KO) has a drug selection cassette, HPT, flanked  
684 by regions of homology to the sequences upstream and downstream of  
685 TGGT1\_265180. 10 $\mu$ g of DraIII-linearized p265180\_KO was transfected into  $\Delta ku80$   
686 parasites using Nucleofector<sup>TM</sup> (Lonza) and parasites were then selected for the  
687 expression of HPT, as described above. Disruption of TGGT1\_265180 was confirmed  
688 by PCR using three primer sets (Supplementary table S2). The first primer set (P1)  
689 amplifies a 637bp region present in wildtype parasites and absent in the knockout strain  
690 (Fig. 7A). The second primer set (P2) was designed to amplify a 1933bp fragment only  
691 present if the double homologous recombination of the knockout construct occurred at  
692 the TgGT1\_265180 locus (Fig. 7A). The final primer set (P3) amplifies a fragment in  
693 both the wildtype and knockout strains (Fig. 7A).

694 For exogenous expression of TGGT1\_265180, a 3700bp fragment beginning  
695 approximately 2kb upstream of the TgGT1\_265180 start codon and ending at its stop  
696 codon was PCR amplified from genomic DNA. This PCR amplicon was inserted into the  
697 PacI site of pLIC-HA(3x)-DHFR by In-Fusion cloning. The same method was used to  
698 create a plasmid lacking the predicted SID, thus truncating the gene. These plasmids  
699 were used as templates to amplify an 8kb fragment that included the TgGT1\_265180  
700 gene under the control of its own promoter, a triple hemagglutinin tag, and the DHFR  
701 drug selection cassette. Primers used included overhangs homologous to the remnants  
702 of the  $\Delta ku80$  site on each side of a double-stranded cut created by CRISPR/Cas9. The  
703 8kb PCR fragment was gel extracted using the NucleoSpin Gel and PCR Clean-up kit  
704 (Macherey-Nagel) and eluted in P3 Buffer (Lonza) for nucleofection. The pSAG1-Cas9-

705 U6-sgUPRT plasmid, generously provided by the Sibley lab (25), was mutated to  
706 contain a guide RNA targeted to the Ku80 site. TGGT1\_265180 knockout and parental  
707 parasites were transfected with 1 $\mu$ g of either the full-length (265180-HA) or truncated  
708 (265180 $\Delta$ SID-HA) PCR amplicons and 2 $\mu$ g of pSAG1-Cas9-sgKu80 using the  
709 Nucleofector<sup>TM</sup> (Lonza). Parasites were selected for the presence of DHFR, as  
710 described above. Immunofluorescence and western blot (see below) was used to  
711 confirm expression and localization of the exogenous copies of TgGT1\_265180.

### 712 *Immunofluorescence microscopy analysis*

713 For IFA, infected HFFs were fixed with 3.5% formaldehyde, quenched with 100 mM  
714 glycine, and blocked and permeabilized in 3% bovine serum albumin (BSA) and 0.2%  
715 Triton x-100 (TX-100) in PBS. Samples were then incubated with primary antibodies in  
716 PBS/3% BSA/0.2% TX-100 for one hour, washed five times with PBS, and incubated  
717 with Alexa Fluor conjugated secondary antibodies in PBS/3% BSA for one hour.  
718 Coverslips were washed with PBS and mounted on glass slides with 3  $\mu$ L DAPI  
719 containing Vectashield. For 3D-SIM microscopy coverslips were stained with a liquid  
720 DAPI solution in PBS, washed, and inverted on a glass slide with Vectashield mounting  
721 medium without DAPI. Image acquisition and processing was performed on either a  
722 Nikon Eclipse 80i microscope with NIS-Elements AR 3.0 software or a Leica DMI6000 B  
723 microscope with LAS X 1.5.1.13187 software. 3D-SIM was performed utilizing the OMX  
724 3D-SIM super-resolution system located within the Light Microscopy Imaging Center at  
725 Indiana University Bloomington (<http://www.indiana.edu/~lmic/microscopes/OMX.html>).  
726 The system is equipped with four Photometrics Cascade II EMCCD cameras that permit

727 imaging four colors simultaneously and is controlled by DV-OMX software. Images  
728 processing was completed using the Applied Precision softWoRx software.

729 Primary antibodies used in this study included rabbit anti-HA (Cell signaling  
730 Technology), rabbit anti-myc (Cell Signaling Technology), a rabbit polyclonal antibody  
731 against the MORN1 protein (56), mouse monoclonal antibody 5F4 (detects F<sub>1</sub>B  
732 ATPase, P. Bradley, unpublished), and rabbit anti-acetyl-K40- $\alpha$ -tubulin (EMD Millipore  
733 ABT241), all used at 1:1,000, with the exception of 5F4 which was used at 1:5,000.  
734 Secondary antibodies included Alexa Fluor 594 or Alexa Fluor 488 conjugated goat anti-  
735 rabbit and goat anti-mouse (Invitrogen), all used at 1:2,000.

736 *Phenotypic characterization of mutant and complemented strains.*

737 For drug effects on mitochondrial morphology infected HFFs on coverslips were  
738 vehicle or drug treated with monensin (1 ng/mL), atovaquone (100 nM), pyrimethamine  
739 (1  $\mu$ M), or myxothiazol (50 ng/mL) for 12 hours. To allow for recovery, drug medium was  
740 washed away and replaced with normal growth medium for an additional 12 hours. IFA  
741 was performed as above using F<sub>1</sub>B ATPase antibodies to monitor the mitochondrion.  
742 Samples were blinded and at least 100 vacuoles per sample were inspected.  
743 Experiments were performed in experimental and biological triplicates.

744 Plaque and doubling assays were performed with 12-well plates using standard  
745 methods (57). Briefly, for the plaque assays 500 freshly egressed parasites were added  
746 to confluent HFF monolayers. After four days of incubation, cultures were fixed with  
747 methanol for 5 minutes and stained with Crystal Violet. Plaques were imaged using a  
748 ProteinSimple imaging system and number of plaques were counted on a light  
749 microscope. Experiments were performed in experimental and biological triplicates.

750 *Yeast two-hybrid screen*

751 Yeast two-hybrid screening was performed by Hybrigenics Services, S.A.S., Paris,  
752 France (<http://www.hybrigenics-services.com>). The coding sequence for Fis1 (aa 2-118;  
753 XM\_018781322.1) was PCR-amplified and cloned into pB66 as a C-terminal fusion with  
754 the Gal4 DNA-binding domain (Gal4-Fis1). The construct was checked by sequencing  
755 and used as a bait to screen a random-primed *Toxoplasma* cDNA library constructed  
756 into pP6. pB66 derives from the original pAS2 $\Delta\Delta$  vector (58) and pP6 is based on the  
757 pGADGH plasmid (59). 46 million clones (5-fold the complexity of the library) were  
758 screened using a mating approach with YHGX13 (Y187 *ade2-101::loxP-kanMX-loxP*,  
759 *mat $\alpha$* ) and CG1945 (*mat $\alpha$* ) yeast strains as previously described (58). 247 His<sup>+</sup> colonies  
760 were selected on a medium lacking tryptophan, leucine and histidine. The prey  
761 fragments of the positive clones were amplified by PCR and sequenced at their 5' and  
762 3' junctions. The resulting sequences were used to identify the corresponding  
763 interacting proteins in the GenBank database (NCBI) using a fully automated procedure.  
764 A confidence score (PBS, for Predicted Biological Score) was attributed to each  
765 interaction as previously described (60).

766 *Immunoprecipitation Assay*

767 To confirm the results of the yeast two-hybrid screening, we performed one  
768 immunoprecipitation assay using RH $\Delta$ *hpt*+HAFis1, with the parental RH $\Delta$ *hpt* parasites  
769 as a negative control. Extracellular parasites from 10 T175 culture flasks were spun  
770 down, washed twice with cold PBS, and resuspended in Pierce Co-IP Lysis buffer  
771 (Fisher Scientific) with Protease/Phosphatase Inhibitor Cocktail (100X, Cell Signaling  
772 Technology). After one hour of lysis at 4°C, the samples were sonicated three times for

773 15 seconds, with one-minute rest period between each sonication. After sonication,  
774 samples were pelleted and the supernatant transferred to Pierce™ Anti-HA Magnetic  
775 Beads (Fisher Scientific). Samples were placed on a rocker at 4°C for 2.5 hours before  
776 beads were washed once with Pierce Co-IP Lysis buffer and twice with PBS. Beads  
777 were resuspended in 8M urea and sent for LC/MS-MS analysis. Results were narrowed  
778 down to proteins that had at least 4 peptides in the RH $\Delta$ *hpt*+HAFis1 sample and none in  
779 the RH $\Delta$ *hpt* control. This shortened list was then compared to the list of putative  
780 interactors obtained through yeast two-hybrid.

#### 781 *Western blots*

782 Extracellular parasites were pelleted and resuspended in 2X Laemmli Sample  
783 Buffer (Bio-Rad) with 5% 2-mercaptoethanol (Sigma-Aldrich). Samples were boiled for 5  
784 minutes at 95°C before separation on a gradient 4-20% SDS-PAGE gel (Bio-Rad).  
785 Samples were then transferred to nitrocellulose membrane using standard methods for  
786 semi-dry transfer (Bio-Rad). Membranes were probed with rabbit anti-HA (Cell Signaling  
787 Technologies), mouse anti-c-myc (Cell Signaling Technologies), or mouse anti-SAG1  
788 (Thermo Fisher) at a dilution of 1:5000 for 1 hour. Membranes were then washed and  
789 probed with either goat anti-mouse horseradish peroxidase or goat anti-rabbit  
790 horseradish peroxidase (Sigma-Aldrich) at a dilution of 1:10000 for 1 hour (GE  
791 Healthcare). Proteins were detected using SuperSignal West Femto substrate (Thermo  
792 Fisher) and imaged using the FluorChem R system (Biotechne). All original western  
793 blots are shown in supplemental dataset 2.

794 For comparative analysis of LMF1 protein levels in RH $\Delta$ *ku80*:Fis1 $\Delta$ ™ parasites  
795 to that of RH $\Delta$ *ku80*, parasites were centrifuged and washed once with PBS. Parasites

796 were counted using a hemocytometer and the parasite pellets were resuspended at  
797 appropriate volumes to equilibrate the concentration of parasites. The subsequent  
798 immunoblots were then probed for anti-SAG1 as a loading control. ImageJ was used for  
799 densitometry analysis of the detected protein band and compared to SAG1 signal. The  
800 ratio of LMF1 protein levels (normalized to the SAG1 levels in the same sample) of  
801 RH $\Delta ku80$ :Fis1 $\Delta$ TM to RH $\Delta ku80$  was determined and represented as a percentage.  
802 These were done in biological triplicate and the described percentage is an average of  
803 these replicates.

#### 804 *Statistical analysis*

805 Statistics were performed with either JMP14.0 or Prism software.

806 **REFERENCES**

- 807 1. Webster JP. 2010. Dubey, J.P. Toxoplasmosis of Animals and Humans. Parasites &  
808 Vectors 3:112.
- 809 2. Melo EJL, Attias M, De Souza W. 2000. the single mitochondrion of tachyzoites of  
810 *Toxoplasma gondii*. Journal of Structural Biology 130:27–33.
- 811 3. Kovacs JA. 1992. Efficacy of atovaquone in treatment of toxoplasmosis in patients  
812 with AIDS. The NIAID-Clinical Center Intramural AIDS Program. Lancet 340:637–  
813 638.
- 814 4. Müller IB, Hyde JE. 2010. Antimalarial drugs: modes of action and mechanisms of  
815 parasite resistance. Future Microbiol 5:1857–1873.
- 816 5. Doggett JS, Nilsen A, Forquer I, Wegmann KW, Jones-Brando L, Yolken RH,  
817 Bordón C, Charman SA, Katneni K, Schultz T, Burrows JN, Hinrichs DJ, Meunier B,  
818 Carruthers VB, Riscoe MK. 2012. Endochin-like quinolones are highly efficacious  
819 against acute and latent experimental toxoplasmosis. PNAS 109:15936–15941.
- 820 6. Goodman CD, Buchanan HD, McFadden GI. 2017. Is the mitochondrion a good  
821 malaria drug target? Trends Parasitol 33:185–193.
- 822 7. Rosdah AA, K. Holien J, Delbridge LMD, Disting GJ, Lim SY. 2016. Mitochondrial  
823 fission – a drug target for cytoprotection or cytodestruction? Pharmacol Res  
824 Perspect 4.

- 825 8. Rehman J, Zhang HJ, Toth PT, Zhang Y, Marsboom G, Hong Z, Salgia R, Husain  
826 AN, Wietholt C, Archer SL. 2012. Inhibition of mitochondrial fission prevents cell  
827 cycle progression in lung cancer. *FASEB J* 26:2175–2186.
- 828 9. Xie Q, Wu Q, Horbinski CM, Flavahan WA, Yang K, Zhou W, Dombrowski SM,  
829 Huang Z, Fang X, Shi Y, Ferguson AN, Kashatus DF, Bao S, Rich JN. 2015.  
830 Mitochondrial control by DRP1 in brain tumor initiating cells. *Nat Neurosci* 18:501–  
831 510.
- 832 10. Nishi M, Hu K, Murray JM, Roos DS. 2008. Organellar dynamics during the cell  
833 cycle of *Toxoplasma gondii*. *Journal of Cell Science* 121:1559–1568.
- 834 11. van der Blik AM. 2000. A Mitochondrial Division Apparatus Takes Shape. *J Cell*  
835 *Biol* 151:f1–f4.
- 836 12. Breinich MS, Ferguson DJP, Foth BJ, van Dooren GG, Lebrun M, Quon DV,  
837 Striepen B, Bradley PJ, Frischknecht F, Carruthers VB, Meissner M. 2009. A  
838 Dynamin is required for the biogenesis of secretory organelles in *Toxoplasma*  
839 *gondii*. *Current Biology* 19:277–286.
- 840 13. van Dooren GG, Reiff SB, Tomova C, Meissner M, Humbel BM, Striepen B. 2009. A  
841 Novel dynamin-related protein has been recruited for apicoplast fission in  
842 *Toxoplasma gondii*. *Current Biology* 19:267–276.
- 843 14. Heredero-Bermejo I, Varberg JM, Charvat R, Jacobs K, Garbuz T, Sullivan WJ,  
844 Arrizabalaga G. 2019. TgDrpC, an atypical dynamin-related protein in *Toxoplasma*



845 *gondii*, is associated with vesicular transport factors and parasite division. Molecular  
846 Microbiology 111:46–64.

847 15. Amiar S, Katris NJ, Berry L, Dass S, Shears MJ, Brunet C, Touquet B, Hakimi M-A,  
848 McFadden GI, Yamaro-Botté Y, Botté CY. 2019. Division and adaptation to host  
849 nutritional environment of apicomplexan parasites depend on apicoplast lipid  
850 metabolic plasticity and host organelles remodelling. bioRxiv 585737.

851 16. Melatti C, Pieperhoff M, Lemgruber L, Pohl E, Sheiner L, Meissner M. 2019. A  
852 unique dynamin-related protein is essential for mitochondrial fission in *Toxoplasma*  
853 *gondii*. PLOS Pathogens 15:e1007512.

854 17. Ovciarikova J, Lemgruber L, Stilger KL, Sullivan WJ, Sheiner L. 2017. Mitochondrial  
855 behaviour throughout the lytic cycle of *Toxoplasma gondii*. Sci Rep 7:42746.

856 18. Ovciarikova J, Lemgruber L, Stilger KL, Sullivan WJ, Sheiner L. 2017. Mitochondrial  
857 behaviour throughout the lytic cycle of *Toxoplasma gondii*. Sci Rep 7:42746.

858 19. Prinz WA. 2014. Bridging the gap: Membrane contact sites in signaling, metabolism,  
859 and organelle dynamics. J Cell Biol 205:759–769.

860 20. Charvat RA, Arrizabalaga G. 2016. Oxidative stress generated during monensin  
861 treatment contributes to altered *Toxoplasma gondii* mitochondrial function. Sci Rep  
862 6.

- 863 21. Lavine MD, Arrizabalaga G. 2012. Analysis of monensin sensitivity in *Toxoplasma*  
864 *gondii* reveals autophagy as a mechanism for drug induced death. PLoS ONE  
865 7:e42107.
- 866 22. Thierbach G, Reichenbach H. 1981. Myxothiazol, a new inhibitor of the cytochrome  
867 b-c1 segment of th respiratory chain. Biochim Biophys Acta 638:282–289.
- 868 23. Garbuz T, Arrizabalaga G. 2017. Lack of mitochondrial MutS homolog 1 in  
869 *Toxoplasma gondii* disrupts maintenance and fidelity of mitochondrial DNA and  
870 reveals metabolic plasticity. PLOS ONE 12:e0188040.
- 871 24. Padgett LR, Arrizabalaga G, Sullivan WJ. 2017. Targeting of tail-anchored  
872 membrane proteins to subcellular organelles in *Toxoplasma gondii*. Traffic 18:149–  
873 158.
- 874 25. Shen B, Brown KM, Lee TD, Sibley LD. 2014. Efficient gene disruption in diverse  
875 strains of *Toxoplasma gondii* Using CRISPR/CAS9. mBio 5:e01114-14.
- 876 26. Rain JC, Selig L, De Reuse H, Battaglia V, Reverdy C, Simon S, Lenzen G, Petel F,  
877 Wojcik J, Schächter V, Chemama Y, Labigne A, Legrain P. 2001. The protein-  
878 protein interaction map of *Helicobacter pylori*. Nature 409:211–215.
- 879 27. Wojcik J, Boneca IG, Legrain P. 2002. Prediction, assessment and validation of  
880 protein interaction maps in bacteria. J Mol Biol 323:763–770.

- 881 28. Sidik SM, Huet D, Ganesan SM, Huynh M-H, Wang T, Nasamu AS, Thiru P, Saeij  
882 JPJ, Carruthers VB, Niles JC, Lourido S. 2016. A genome-wide CRISPR Screen in  
883 *Toxoplasma* identifies essential apicomplexan genes. *Cell* 166:1423-1435.e12.
- 884 29. Hu K, Mann T, Striepen B, Beckers CJM, Roos DS, Murray JM. 2002. Daughter cell  
885 assembly in the protozoan parasite *Toxoplasma gondii*. *MBoC* 13:593–606.
- 886 30. Tondera D, Grandemange S, Jourdain A, Karbowski M, Mattenberger Y, Herzig S,  
887 Da Cruz S, Clerc P, Raschke I, Merkwirth C, Ehses S, Krause F, Chan DC,  
888 Alexander C, Bauer C, Youle R, Langer T, Martinou J-C. 2009. SLP-2 is required for  
889 stress-induced mitochondrial hyperfusion. *EMBO J* 28:1589–1600.
- 890 31. Visser W, van Spronsen EA, Nanninga N, Pronk JT, Kuenen JG, van Dijken JP.  
891 1995. Effects of growth conditions on mitochondrial morphology in *Saccharomyces*  
892 *cerevisiae*. *Antonie van Leeuwenhoek* 67:243–253.
- 893 32. De Vos KJ, Allan VJ, Grierson AJ, Sheetz MP. 2005. Mitochondrial function and  
894 actin regulate dynamin-related protein 1-dependent mitochondrial fission. *Current*  
895 *Biology* 15:678–683.
- 896 33. Mendl N, Occhipinti A, Müller M, Wild P, Dikic I, Reichert AS. 2011. Mitophagy in  
897 yeast is independent of mitochondrial fission and requires the stress response gene  
898 WHI2. *J Cell Sci* 124:1339–1350.
- 899 34. Stojanovski D, Koutsopoulos OS, Okamoto K, Ryan MT. 2004. Levels of human  
900 Fis1 at the mitochondrial outer membrane regulate mitochondrial morphology. *J Cell*  
901 *Sci* 117:1201.

- 902 35. Yu R, Jin S, Lendahl U, Nistér M, Zhao J. 2019. Human Fis1 regulates  
903 mitochondrial dynamics through inhibition of the fusion machinery. *EMBO J* 38(8).
- 904 36. Zhang Y, Chan DC. 2007. Structural basis for recruitment of mitochondrial fission  
905 complexes by Fis1. *PNAS* 104:18526–18530.
- 906 37. James DI, Parone PA, Mattenberger Y, Martinou J-C. 2003. hFis1, a novel  
907 component of the mammalian mitochondrial fission machinery. *J Biol Chem*  
908 278:36373–36379.
- 909 38. Roux KJ, Kim DI, Raida M, Burke B. 2012. A promiscuous biotin ligase fusion  
910 protein identifies proximal and interacting proteins in mammalian cells. *J Cell Biol*  
911 196:801–810.
- 912 39. Rhee H-W, Zou P, Udeshi ND, Martell JD, Mootha VK, Carr SA, Ting AY. 2013.  
913 Proteomic mapping of mitochondria in living cells via spatially restricted enzymatic  
914 tagging. *Science* 339:1328–1331.
- 915 40. Hung V, Zou P, Rhee H-W, Udeshi ND, Cracan V, Svinkina T, Carr SA, Mootha VK,  
916 Ting AY. 2014. Proteomic mapping of the human mitochondrial intermembrane  
917 space in live cells via ratiometric APEX tagging. *Mol Cell* 55:332–341.
- 918 41. Seidi A, Muellner-Wong LS, Rajendran E, Tjhin ET, Dagley LF, Aw VY, Faou P,  
919 Webb AI, Tonkin CJ, van Dooren GG. 2018. Elucidating the mitochondrial proteome  
920 of *Toxoplasma gondii* reveals the presence of a divergent cytochrome c oxidase.  
921 *eLife* 7:e38131.

- 922 42. Nakai K, Horton P. 1999. PSORT: a program for detecting sorting signals in proteins  
923 and predicting their subcellular localization. *Trends Biochem Sci* 24:34–36.
- 924 43. Claros MG, Vincens P. 1996. Computational method to predict mitochondrially  
925 imported proteins and their targeting sequences. *Eur J Biochem* 241:779–786.
- 926 44. Armenteros JJA, Tsirigos KD, Sønderby CK, Petersen TN, Winther O, Brunak S,  
927 Heijne G von, Nielsen H. 2019. SignalP 5.0 improves signal peptide predictions  
928 using deep neural networks. *Nat Biotechnol* 37:420–423.
- 929 45. Durocher D, Jackson SP. 2002. The FHA domain. *FEBS Lett* 513:58–66.
- 930 46. Helle SCJ, Kanfer G, Kolar K, Lang A, Michel AH, Kornmann B. 2013. Organization  
931 and function of membrane contact sites. *Biochimica et Biophysica Acta (BBA) -  
932 Molecular Cell Research* 1833:2526–2541.
- 933 47. Eisenberg-Bord M, Shai N, Schuldiner M, Bohnert M. 2016. A Tether Is a Tether Is a  
934 Tether: tethering at membrane contact sites. *Developmental Cell* 39:395–409.
- 935 48. Campello S, Lacalle RA, Bettella M, Mañes S, Scorrano L, Viola A. 2006.  
936 Orchestration of lymphocyte chemotaxis by mitochondrial dynamics. *J Exp Med*  
937 203:2879–2886.
- 938 49. Povelones ML, Tiengwe C, Gluenz E, Gull K, Englund PT, Jensen RE. 2013.  
939 Mitochondrial shape and function in trypanosomes requires the outer membrane  
940 protein, TbLOK1. *Mol Microbiol* 87:713–729.

- 941 50. Donald R, Carter D, Ullman B, Roos D. 1996. Insertional tagging, cloning, and  
942 expression of the *Toxoplasma gondii* hypoxanthine-xanthine-guanine  
943 phosphoribosyltransferase gene use as a selectable marker. *Journal of Biological*  
944 *Chemistry* 271:14010–14019.
- 945 51. Huynh M, Carruthers V. 2009. Tagging of endogenous genes in a *Toxoplasma*  
946 *gondii* strain lacking Ku80. *Eukaryotic cell* 8:530–539.
- 947 52. Fox B, Ristuccia J, Gigley J, Bzik D. 2009. Efficient gene replacements in  
948 *Toxoplasma gondii* strains deficient for nonhomologous end joining. *Eukaryotic cell*  
949 8:520–529.
- 950 53. Saeij JPJ, Arrizabalaga G, Boothroyd JC. 2008. A cluster of four surface antigen  
951 genes specifically expressed in bradyzoites, SAG2CDXY, plays an important role in  
952 *Toxoplasma gondii* persistence. *Infection and immunity* 76:2402–10.
- 953 54. Donald R, Roos D. 1998. Gene knock-outs and allelic replacements in *Toxoplasma*  
954 *gondii*: HXGPRT as a selectable marker for hit-and-run mutagenesis. *Molecular and*  
955 *biochemical parasitology* 91:295–305.
- 956 55. Arrizabalaga G, Ruiz F, Moreno S, Boothroyd JC. 2004. Ionophore-resistant mutant  
957 of *Toxoplasma gondii* reveals involvement of a sodium/hydrogen exchanger in  
958 calcium regulation. *J Cell Biol* 165:653–662.
- 959 56. Gubbels M, Vaishnav S. 2006. A MORN-repeat protein is a dynamic component of  
960 the *Toxoplasma gondii* cell division apparatus. *Journal of cell science* 119:2236–  
961 2245.

- 962 57. LaFavers KA, Márquez-Nogueras KM, Coppens I, Moreno SNJ, Arrizabalaga G.  
963 2017. A novel dense granule protein, GRA41, regulates timing of egress and  
964 calcium sensitivity in *Toxoplasma gondii*. *Cell Microbiol* 19(9).
- 965 58. Fromont-Racine M, Rain J-C, Legrain P. 1997. Toward a functional analysis of the  
966 yeast genome through exhaustive two-hybrid screens. *Nature Genetics* 16:277–282.
- 967 59. Bartel PL, Chien CT, Sternglanz R, Fields S. Using the two-hybrid system to detect  
968 protein-protein interactions., p. 153–179. *In* Hartley, DA (ed.), *cellular interactions in*  
969 *development: a practical approach*. Oxford University Press, Oxford.
- 970 60. Formstecher E, Aresta S, Collura V, Hamburger A, Meil A, Trehin A, Reverdy C,  
971 Betin V, Maire S, Brun C, Jacq B, Arpin M, Bellaiche Y, Bellusci S, Benaroch P,  
972 Bornens M, Chanet R, Chavier P, Delattre O, Doye V, Fehon R, Faye G, Galli T,  
973 Girault J-A, Goud B, de Gunzburg J, Johannes L, Junier M-P, Mirouse V, Mukherjee  
974 A, Papadopoulo D, Perez F, Plessis A, Rossé C, Saule S, Stoppa-Lyonnet D,  
975 Vincent A, White M, Legrain P, Wojcik J, Camonis J, Daviet L. 2005. Protein  
976 interaction mapping: a *Drosophila* case study. *Genome Res* 15:376–384.
- 977

978 **ACKNOWLEDGMENTS**

979       This work was by grants from the National Institutes of Health to GA (R01AI123457  
980 and R21AI138255). KJ is funded by a fellowship from NRSA training grant  
981 T32AI060519. RC was funded by a fellowship from the American Heart Association  
982 (15POST22740002). The funders had no role in study design, data collection and  
983 interpretation, or the decision to submit the work for publication. We would like to thank  
984 Hybrigenics for their analyses and support using Y2H. We would also like to thank Dr.  
985 Peter Bradley for generously providing F<sub>1</sub>B ATPase antibody.



986 **FIGURE LEGENDS**

987 **Figure 1. Drug-induced mitochondrial disruption is reversible.** To determine the  
988 effect of drugs on mitochondrial morphology, intracellular parasites were treated with  
989 various agents. Parasite mitochondrial morphology was examined by visualizing the  
990 IMM localized F<sub>1</sub>B ATPase through immunofluorescence microscopy. A. Left panels  
991 show mitochondrion after treatment with vehicle, while right panels show effect of  
992 treatment with 1 mM monensin for 12 hours. Mitochondrion in the vehicle treated  
993 parasites shown is considered intact while in the drug treated parasites shown is  
994 considered disrupted. Scale bar, 2 μm. B. The percent of vacuoles with intact  
995 mitochondria is presented for parasites that were vehicle (veh) treated, monensin (mon)  
996 treated for 12 hours or monensin treated followed by a 12-hour recovery period. C. The  
997 effects of the anti-parasitic drug atovaquone (Ato, 100 nM), pyrimethamine (Pyr, 100  
998 μM), and myxothiazol (Myx, 50 ng/mL) on the mitochondrion was assessed. With each  
999 drug we also tested the effect of a 12-hour recovery period after 12 hours of drug  
1000 treatment. For all graphs 100 vacuoles for each condition were enumerated at random,  
1001 and the data is presented as the average ± SD from 3 independent experiments. One-  
1002 way ANOVA with post-hoc Tukey was utilized for statistical analysis. In B \*\*\*\*p<0.0001  
1003 in comparison to other treatments, in C each drug treatment was compared to vehicle,  
1004 \*\*\*\*p<0.0001, \*\*p<.007, and each treatment was compared to treatment followed by  
1005 recovery, ###p<0.001.

1006 **Figure 2. Fis1 localizes to the *Toxoplasma* outer mitochondrial membrane, which**  
1007 **remains intact after monensin treatment.** To determine the subcellular distribution of  
1008 the fission protein homolog Fis1, a parasite strain expressing an ectopic copy of Fis1

1009 including an N-terminal HA epitope tag was generated. A. Illustration shows the  
1010 exogenously expressed epitope tagged Fis1. Protein domains in Fis1 are indicated:  
1011 tetratricopeptide repeat domains (TPR) 1 and 2 and transmembrane (TM) domain. B-D.  
1012 Intracellular parasites of the (HA)Fis1 expressing strain were analyzed by IFA using  
1013 antibodies against the HA tag to detect Fis1 (in green) and against the *Toxoplasma* F<sub>1</sub>B  
1014 ATPase protein to delineate the inner mitochondrial membrane (in red) using either a  
1015 Nikon Eclipse 80i microscope (B) or an OMX 3D-SIM super-resolution imaging system  
1016 (C and D). In D, intracellular parasites were treated for 8 hours with monensin (1  
1017 ng/mL). White arrowheads in D demarcate regions of Fis1 staining absent of the  
1018 ATPase signal. Scale bar, 2  $\mu$ m.

1019 **Figure 3. Fis1 localization is dependent on its transmembrane domain.** To  
1020 determine the necessity of the TM domain for localization of Fis1 we engineered strains  
1021 in which either an exogenous or the endogenous Fis1 lacked the transmembrane  
1022 domain. A. Schematic of the exogenous HA-Fis $\Delta$ TM. B. Parasites expressing HA-  
1023 Fis $\Delta$ TM were co-stained for the exogenous Fis1 (in green) and the mitochondrial F<sub>1</sub>B  
1024 ATPase (in red). Scale bar, 2  $\mu$ m. C. Schematic of endogenous Fis1 in which TM has  
1025 been replaced by an HA epitope (Fis1 $\Delta$ TM-HA). D. Intracellular parasites of the strain  
1026 expressing the truncated Fis1 were stained with antibodies against the HA tag (green)  
1027 to detect Fis1 $\Delta$ TM and antibodies against F<sub>1</sub>B ATPase (red) to detect mitochondria.  
1028 White arrows indicate abnormal appearing mitochondria. Scale bar, 2  $\mu$ m. E. The  
1029 frequency of Fis1 $\Delta$ TM-HA expressing parasites with abnormal mitochondrial  
1030 morphology (extraneous fragments or branches) was examined and compared to that of  
1031 the parental  $\Delta ku80$  strain. In 3 independent experiments, parasite vacuoles from 15

1032 random fields of view were enumerated, and the data are presented as percent of  
1033 vacuoles with normal mitochondrial morphology  $\pm$  SD. Student's t-test was employed for  
1034 determining statistical significance.

1035 **Figure 4. Disrupting Fis1 reduces monensin-induced mitochondrial remodeling.**

1036 The ability of monensin to induce mitochondrial remodeling was assessed in strains  
1037 expressing a mislocalized Fis1 or lacking Fis1. A. Parasites in which the endogenous  
1038 Fis1 lacks the TM domain were vehicle or monensin treated for 12 hours. Parasite  
1039 vacuoles were enumerated from 10 random fields of view for each strain and condition.  
1040 The data are the average of 4 independent experiments and are presented as percent  
1041 of vacuoles with punctate morphology  $\pm$  SD. Statistical analysis was provided by one-  
1042 way ANOVA post-hoc Tukey, where  $**p < 0.001$  as compared to vehicle. B. Data from A  
1043 was analyzed to compare the number of vacuoles with punctate mitochondrion between  
1044 untreated and treated parasites for each strain. Data is displayed as percent increase of  
1045 vacuoles with punctate mitochondria upon treatment  $\pm$  SD. C. RH $\Delta$ *hpt* parasites  
1046 ectopically expressing the N-terminally HA tagged Fis1 were transfected with a plasmid  
1047 expressing Cas9 and either a Fis1 specific sgRNA or the non-specific UPRT sgRNA.  
1048 After transfection, parasites were immediately infected into HFFs on coverslips.  
1049 Following approximately 16 hours in culture, cultures were vehicle or monensin treated  
1050 for 12 hours and an IFA to monitor mitochondrial morphology was performed. The data  
1051 presented are the averages of 6 coverslips from 2 independent transfections. Bars  
1052 represent percent punctate mitochondria  $\pm$  SD. Statistical significance was determined  
1053 via Two-way ANOVA, treatment  $p < 0.0001$ , genotype  $p = 0.006$ , genotype X treatment  $p =$

1054 0.0003. D. The percent increase in punctate mitochondria between treatment and no  
1055 treatment for the data shown in C was calculated and presented  $\pm$  SD.

1056 **Figure 5. Fis1 interactor TgGT1\_265180 localizes to the outer mitochondrial**  
1057 **membrane.** To investigate the localization of TgGT1\_265180 we introduced sequences  
1058 encoding an N-terminal myc tag to the endogenous locus. A. Intracellular parasites of  
1059 the TgGT1\_265180(myc) expressing strain were stained for the mitochondrial F<sub>1</sub>B  
1060 ATPase (red) and for myc (green). B. Intracellular parasites of the same strain were  
1061 stained for myc (green) and acetylated tubulin (red), which clearly demarcates daughter  
1062 parasites during division. C. Intracellular parasites of the TgGT1\_265180(myc)  
1063 expressing strain were fixed and permeabilized with either 0.005% or 0.01% digitonin  
1064 before staining for the IMM protein F<sub>1</sub>B ATPase (red) and myc (green). TgGT1\_265180  
1065 can be detected when F<sub>1</sub>B ATPase remains inaccessible to the antibodies suggesting  
1066 that it is associated with the OMM. D. TgGT1\_265180(myc) parasites were treated with  
1067 5 mM monensin for 5 hours. Mitochondrial morphology was monitored by IFA for  
1068 TgGT1\_265180(myc) (green) and F<sub>1</sub>B ATPase (red). Scale bar, 2  $\mu$ m.

1069 **Figure 6. Association of TgGT1\_265180 with the mitochondrion depends on Fis1.**  
1070 To investigate how TgGT1\_265180 associates with the mitochondrion we tested the  
1071 role of its C-terminus and of Fis1 on its localization. A. Parasites were transfected with  
1072 an exogenous copy of C-terminally HA tagged wildtype TgGT1\_265180 or with N-  
1073 terminally HA tagged TgGT1\_265180 lacking the Selected Interaction domain (SID).  
1074 The SID is the region of TgGT1\_265180 that was identified as interacting with Fis1.  
1075 Intracellular parasites expressing TgGT1\_265180-HA (left) or TgGT1\_265180 $\Delta$ SID-HA  
1076 (right) were stained for HA. B. Intracellular Fis $\Delta$ TM-HA parasites expressing an

1077 endogenous copy of C-terminally myc tagged TgGT1\_265180 were probed for HA to  
1078 detect Fis1 (red) and for myc to detect TgGT1\_265180 (green) C. Wildtype or Fis $\Delta$ TM-  
1079 HA parasites endogenously expressing TgGT1\_265180-Myc were stained for F<sub>1</sub>B  
1080 ATPase (red) and myc (green) to monitor localization of TgGT1\_265180. Scale bar, 2  
1081  $\mu$ m. D. Representative Western blot of extract from wildtype (WT) and Fis1 $\Delta$ TM  
1082 parasites expressing TgGT1\_265180-myc probed for myc (top blot) and for SAG1  
1083 (bottom blot) as a loading control.

1084 **Figure 7. Knockout of TgGT1\_265180 affects parasite propagation.** To investigate  
1085 the role of TgGT1\_265180 in parasite fitness we established knockout and  
1086 complemented strains. A. Schematic of strategy implemented to disrupt the  
1087 TgGT1\_265180 by replacing the coding sequences by the selectable marker *HPT*. On  
1088 top is the vector used to drive the gene replacement, which includes *HPT* flanked by  
1089 areas of homology to the TgGT1\_265180 locus (dark grey boxes) and a downstream  
1090 copy of GFP that is not integrated upon the desired double homologous recombination  
1091 and can be used as a negative selectable marker. Endogenous TgGT1\_265180 is  
1092 depicted in the middle with coding sequences represented by a black box. Bottom  
1093 drawing shows the expected result from gene replacement in the knockout strain. P1,  
1094 P2, and P3 indicate the PCR amplicons that were used to confirm integration. P1 would  
1095 only be detected from parental parasites, P2 only from knockout parasites and P3 from  
1096 both. B. PCR products from reactions to detect P1, P2 and P3 in the parental strain and  
1097 the established  $\Delta$ 265180 clone. C. Average number of plaques per well for either  
1098 parental or knockout strains after 4-day incubation period. Plaque assays were done in  
1099 biological and technical triplicates, with error bars representing  $\pm$ SD. Statistical analysis

1100 via t-test, \*\*\*\* $p < 0.0001$  D. Diagrams depict the two constructs used for  
1101 complementation: TgGT1\_265180-HA and TgGT1\_265180 $\Delta$ SID-HA. SID is the  
1102 Selected Interaction Domain identified through the two-hybrid screen. E. Representative  
1103 Western blot of a strain in which the endogenous TgGT1\_265180 includes a HA epitope  
1104 tag (Par), and the knockout strain complemented with wildtype TgGT1\_265180-HA (KO  
1105 comp WT) or with TgGT1\_265180 $\Delta$ SID-HA (KO comp  $\Delta$ SID) probed for HA (top blot)  
1106 and for SAG1 (bottom blot) as a loading control. F. Average number of plaques per well  
1107 for each strain after 4-day incubation period. Plaque assays were done in biological and  
1108 technical triplicates, with error bars representing  $\pm$ SD. Statistical analysis performed  
1109 using One-way Anova, \*\*\*\* $p < 0.0001$  and \*\* $p < 0.0019$

1110 **Figure 8. Mitochondrial morphology is disrupted by lack of TgGT1\_265180.** To  
1111 determine the effect of TgGT1\_265180 ablation on the mitochondrion knockout and  
1112 complemented parasites were analyzed by IFA. A. Intracellular parasites of the parental  
1113 or the  $\Delta$ 265180 strain were stained for F<sub>1</sub>B ATPase (green) to monitor mitochondrion  
1114 and for acetylated tubulin (acTub) to detect the parasite cytoskeleton (red). B. and C.  
1115 IFA of knockout parasites ( $\Delta$ 265180) transformed with either the wildtype (265180(HA))  
1116 or truncated TgGT1\_265180 (265180 $\Delta$ SID(HA)) with antibodies against F<sub>1</sub>B ATPase  
1117 (red) and HA (green). Scale bar, 2  $\mu$ m.

1118 **Figure 9. Intracellular parasites lacking TgGT1\_265180 do not maintain their**  
1119 **mitochondrion in the lasso conformation.** To determine the penetrance of the  
1120 mitochondrial phenotype observed in with the  $\Delta$ 265180 strain the different  
1121 morphological patterns observed were quantitated. A. Intracellular parasites of the  
1122  $\Delta$ 265180 stained for F<sub>1</sub>B ATPase (green) and acetylated tubulin (red) exhibiting three

1123 distinct mitochondrial morphologies: lasso, collapsed, and sperm-like. Scale bar, 2  $\mu$ m  
1124 B. Percentage of parasites with each of the three different morphologies for the parental  
1125 (par), knockout ( $\Delta 265180$ ) and complemented strains ( $\Delta 265180+265180(\text{HA})$  and  
1126  $\Delta 265180+265180\Delta \text{SID}(\text{HA})$ ). Data is average of biological triplicates, at least 50  
1127 vacuoles per sample were inspected. Error bars are SD. Statistics shown are ANOVA of  
1128 percentage of parasites with lasso shape for each strain. \*\*\*\* $p < 0.001$ , \*\* $p < 0.004$ ,  
1129 ## $p < 0.003$ , and %% $p < 0.002$ .

1130 **Figure 10. Parasites lacking TgGT1\_265180 exhibit various division related**  
1131 **phenotypes.** IFA of knockout parasites stained for F<sub>1</sub>B ATPase (green) and acetylated  
1132 tubulin (red) reveal various aberrant phenotypes. A. Image on the left is of  $\Delta 265180$   
1133 vacuole containing five parasites rather than either four or eight as expected. Graph  
1134 shows the percentage of vacuoles with abnormal number of parasites for the three  
1135 strains. B. Image shows vacuole with amitochondriate parasites (arrows) based on lack  
1136 of F<sub>1</sub>B ATPase signal. Graph shows the percentage of vacuoles with at least one  
1137 amitochondriate parasite for each strain. C. Image is of vacuole that contains parasites  
1138 with F<sub>1</sub>B ATPase signal outside of the parasite and within the parasitophorous vacuole  
1139 (arrows). Scale bar, 2  $\mu$ m. Graph shows the percentage of vacuoles with this  
1140 phenotype. For all graphs  $n=3 \pm \text{SD}$  with at least 50 vacuoles per sample inspected.  
1141 Statistical analysis done with on-way ANOVA Tukey post-hoc, \*\*\*\* $p < 0.0006$  \*\* $p < 0.002$ ,  
1142 \* $p < 0.02$ , ## $p < 0.006$ , %% $p < 0.001$

1143 **Figure 11. TgGT1\_265180 disruption results in mitochondrial segregation defects.**  
1144 To examine mitochondrial dynamics during parasite division IFAs of parasites during  
1145 early (E), intermediate (I), and late (L) stages of endodyogeny were conducted. A. IFAs

1146 of intracellular wildtype parasites. B. IFAs of intracellular  $\Delta 265180$  (aka LMF1) knockout  
1147 parasites. In both A and B stage of division was determined by DAPI staining (blue) and  
1148 acetylated tubulin (red), which demarcate budding daughters. Mitochondrial morphology  
1149 was observed by staining with F<sub>1</sub>B ATPase, shown here in green. Scale bar, 2  $\mu$ m.



1150

| Gene ID      | Product Description                      | PBS |
|--------------|------------------------------------------|-----|
| TGGT1_215520 | hypothetical protein                     | A   |
| TGGT1_218560 | acetyl-coA carboxylase ACC2              | B   |
| TGGT1_222800 | glycogen synthase, putative              | B   |
| TGGT1_265180 | hypothetical protein                     | B   |
| TGGT1_224270 | hypothetical protein                     | C   |
| TGGT1_293840 | hypothetical protein                     | C   |
| TGGT1_201390 | hypothetical protein                     | D   |
| TGGT1_226050 | hypothetical protein                     | D   |
| TGGT1_237015 | GRA43                                    | D   |
| TGGT1_246720 | hypothetical protein                     | D   |
| TGGT1_247700 | AP2 domain transcription factor AP2XII-4 | D   |
| TGGT1_284620 | hypothetical protein                     | D   |
| TGGT1_286470 | AGC kinase                               | D   |
| TGGT1_287980 | FHA domain-containing protein            | D   |
| TGGT1_297770 | hypothetical protein                     | D   |
| TGGT1_299670 | hypothetical protein                     | D   |
| TGGT1_304990 | guanylate-binding protein                | D   |
| TGGT1_321370 | hypothetical protein                     | D   |
| TGGT1_321450 | Myb family DNA-binding domain-containing | D   |

1151

1152 **Table 1.** Proteins identified as Fis1 interactors through a yeast two hybrid screen.

1153 Predicted biological scores (PBS) are confidence score, with A indicating the highest

1154 confidence of interaction and D being the lowest (14). Highlighted are proteins also

1155 identified in the mitochondrial proteome (41).

# Figure 1

A.

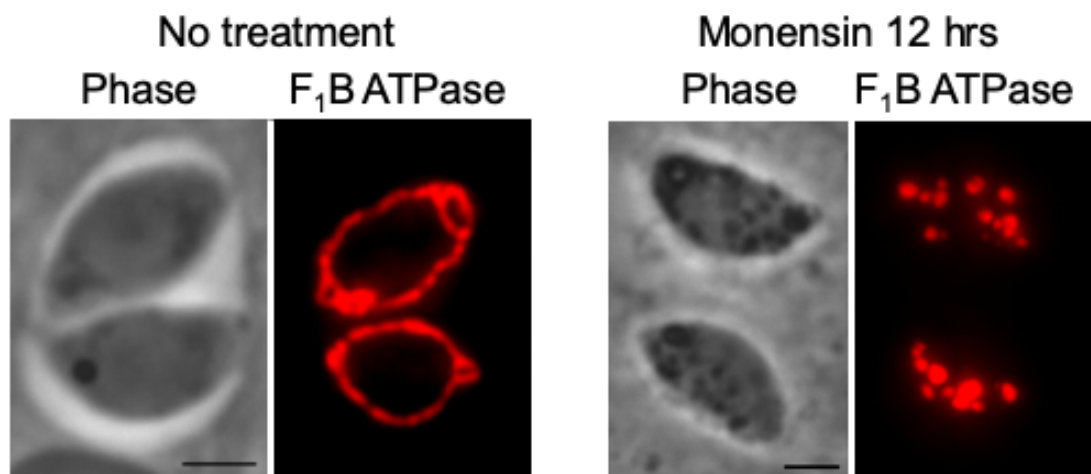

B.

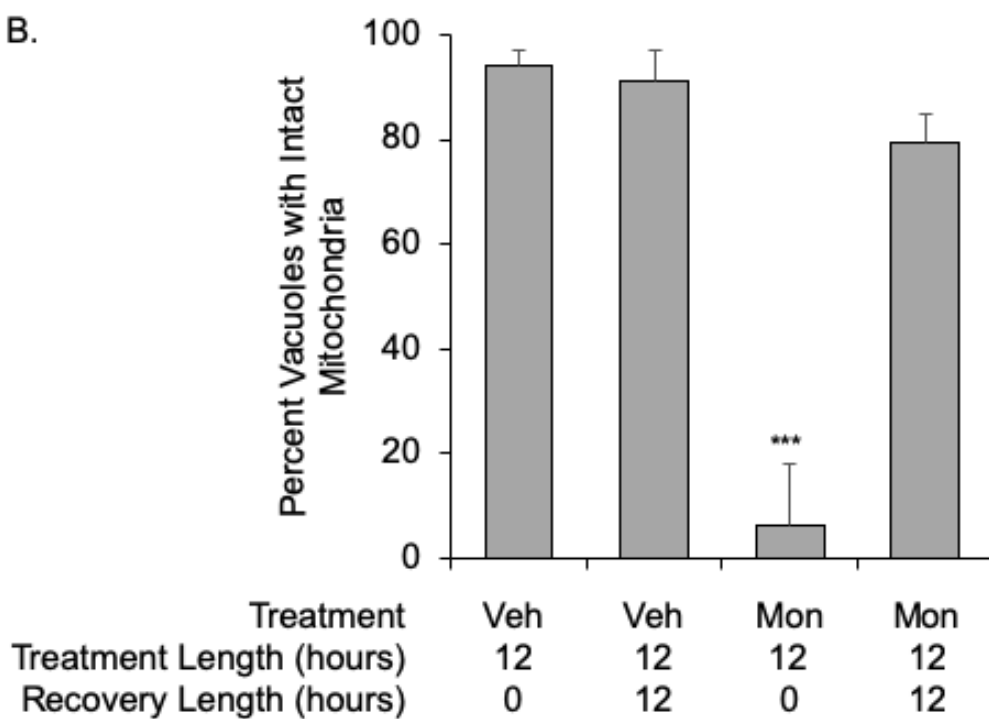

C.

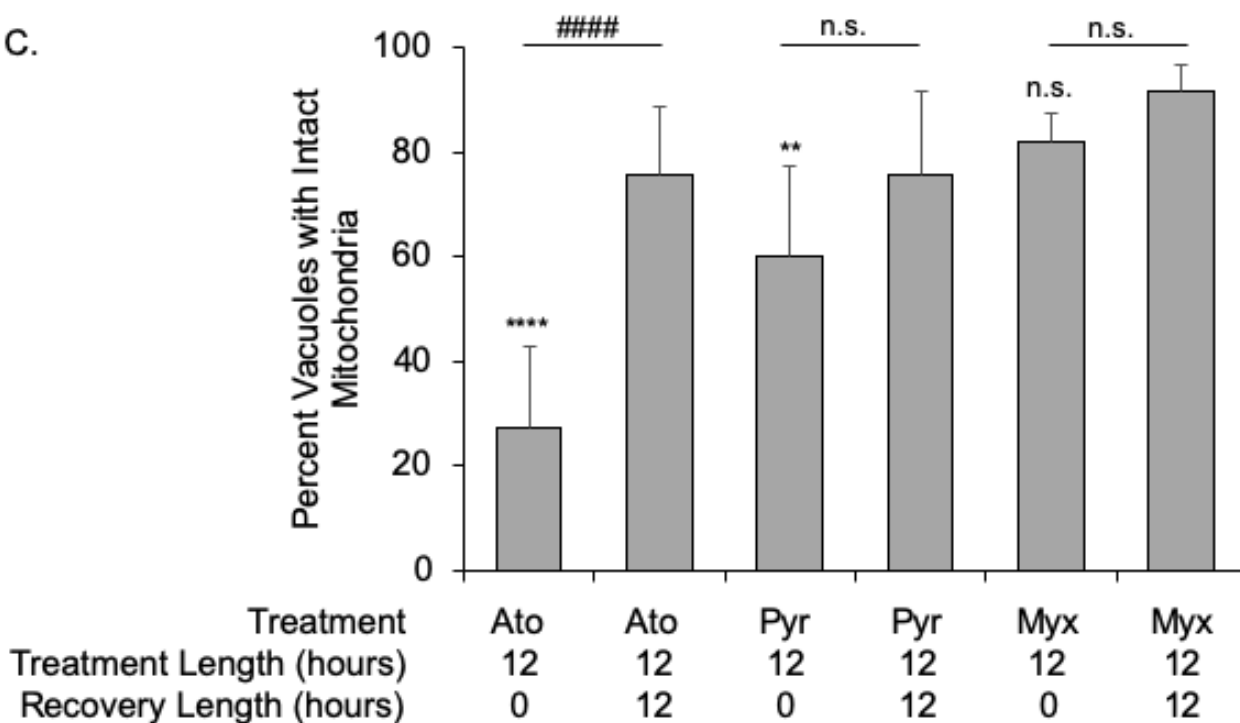

## Figure 2

A.

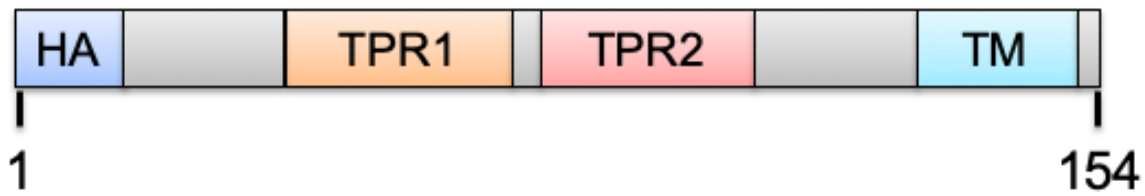

B.

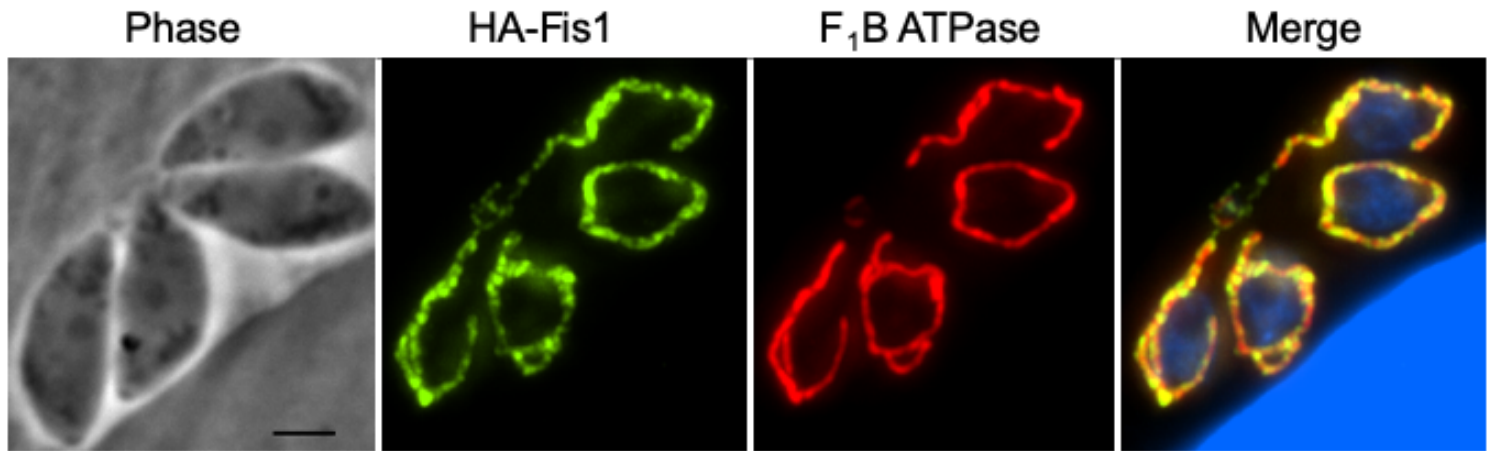

C.

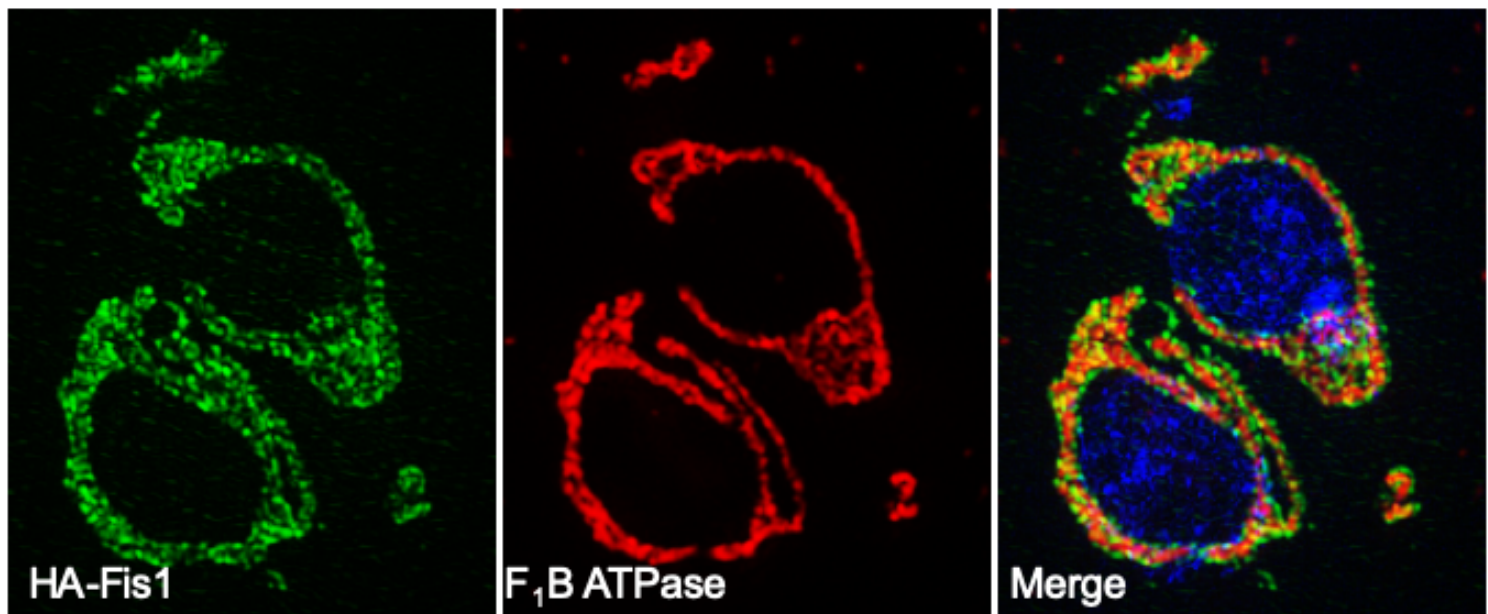

D.

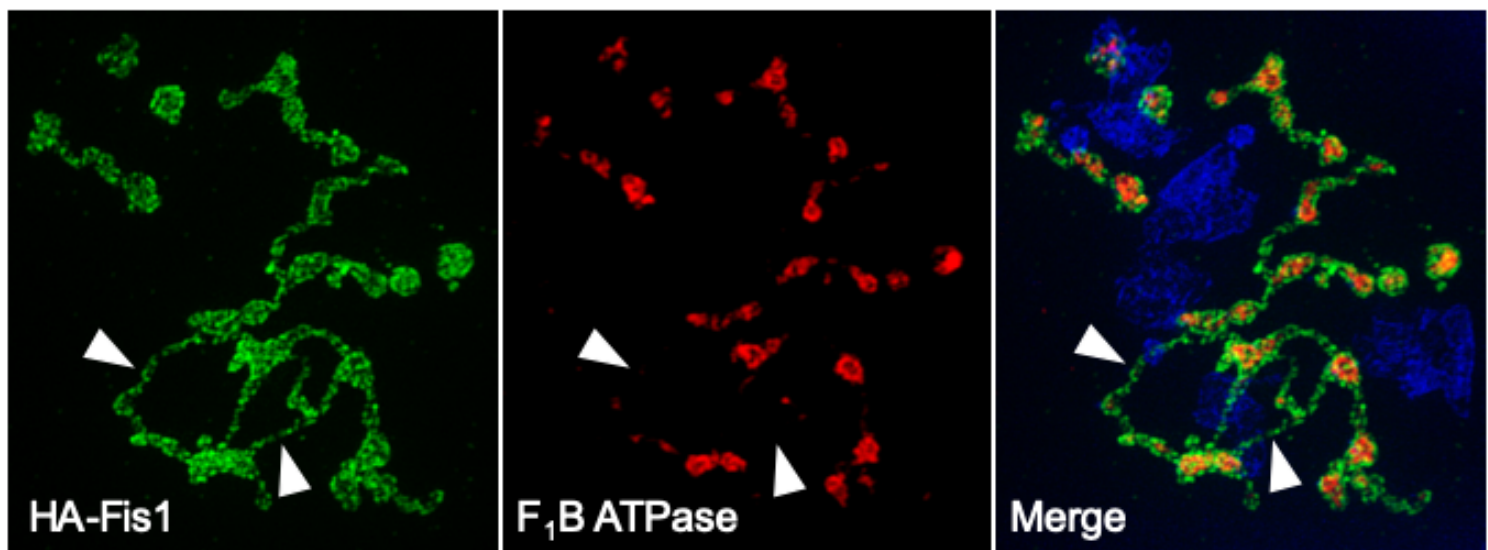

### Figure 3

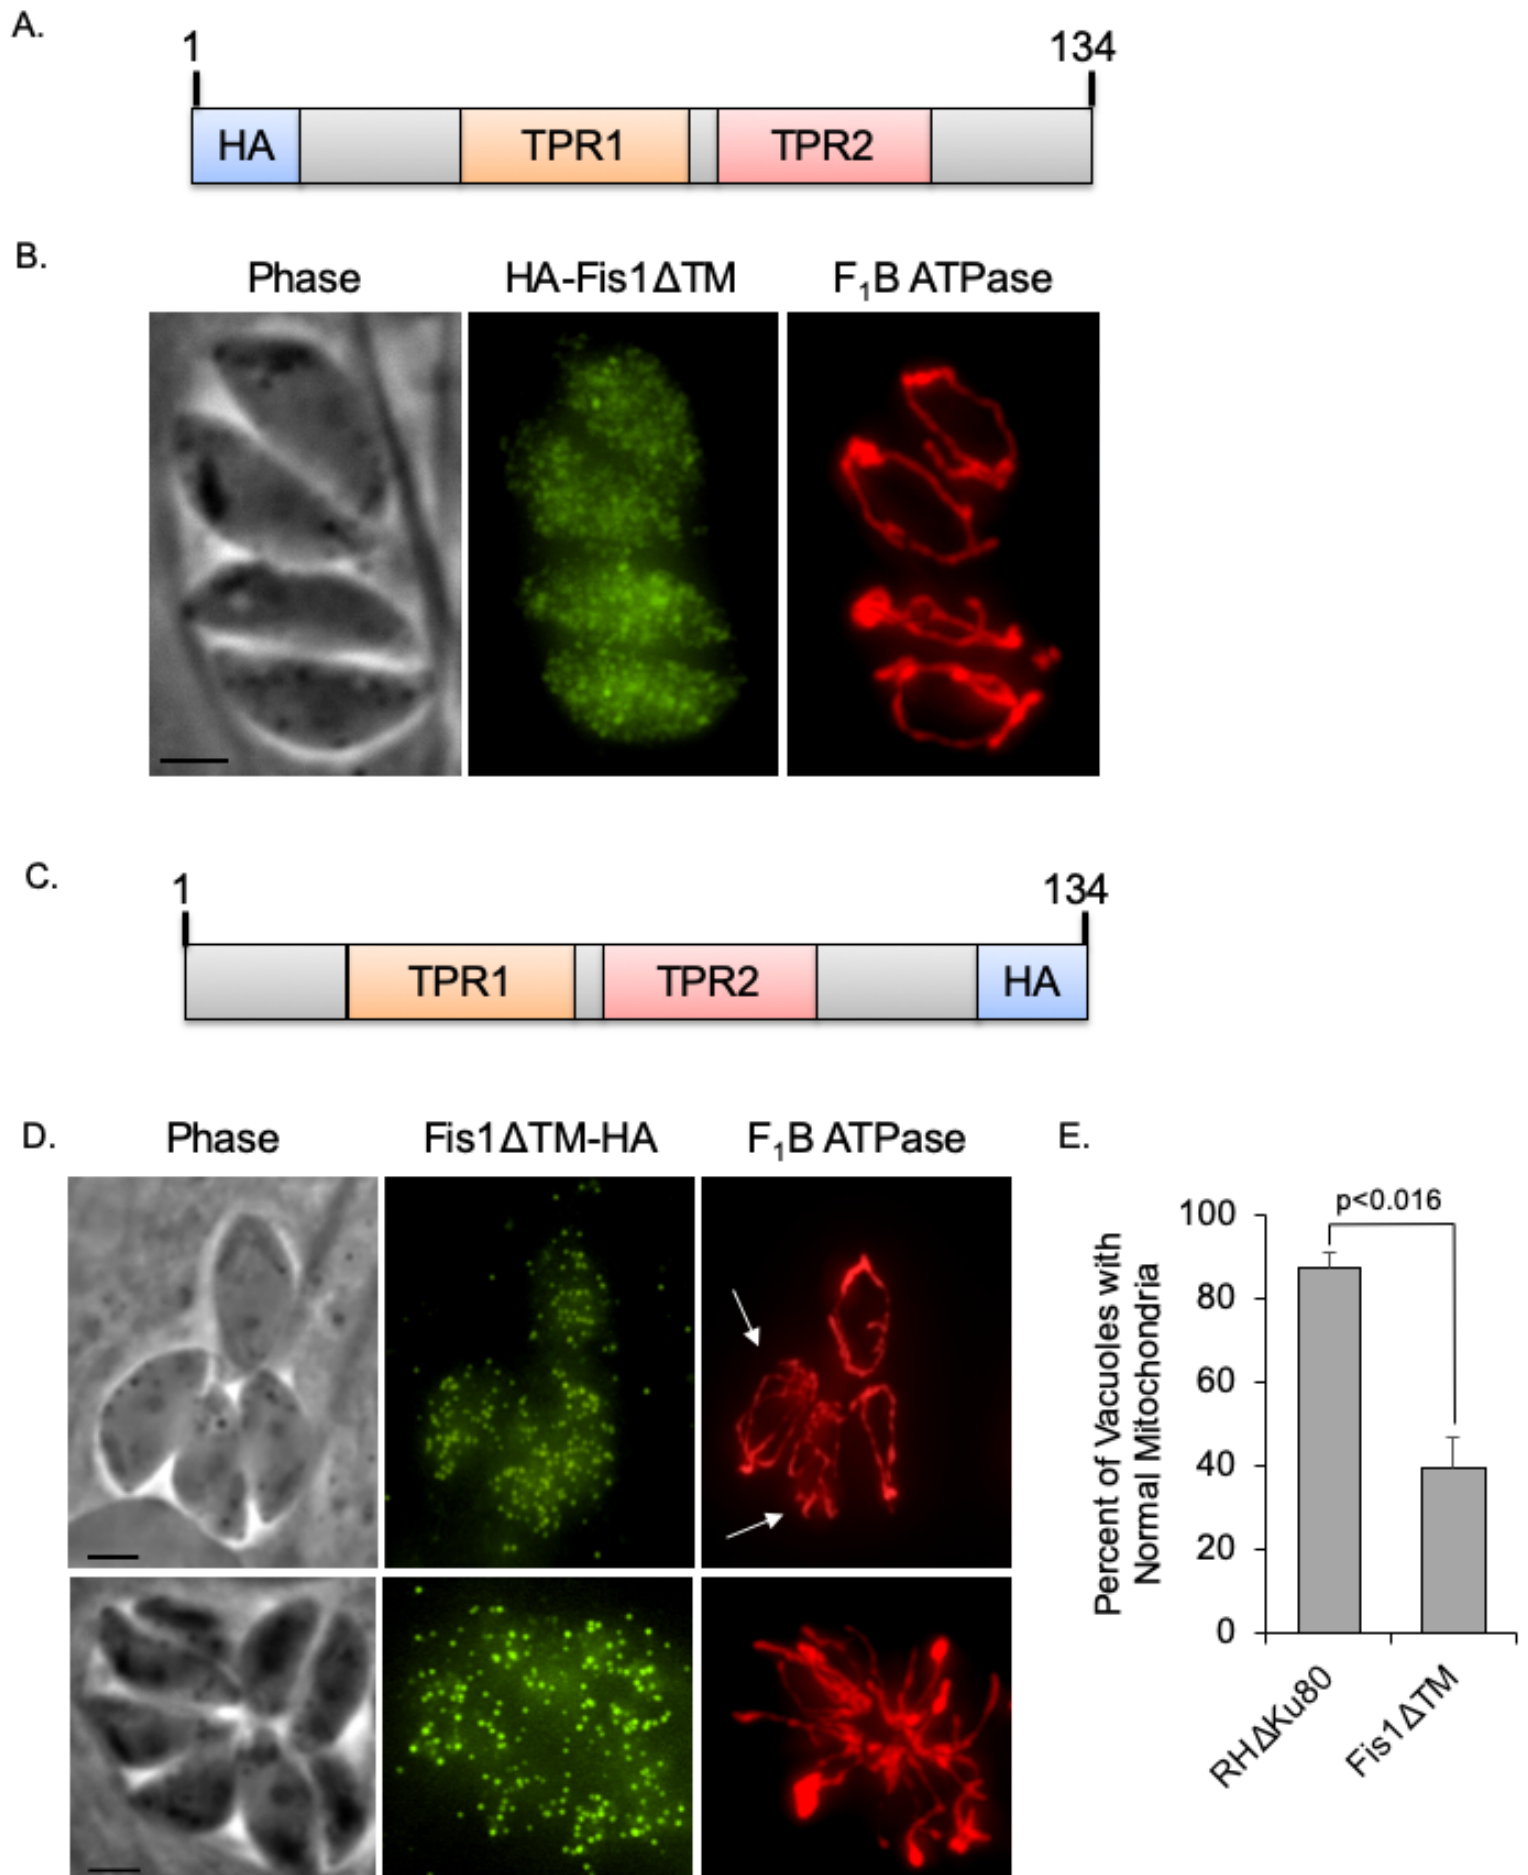

## Figure 4

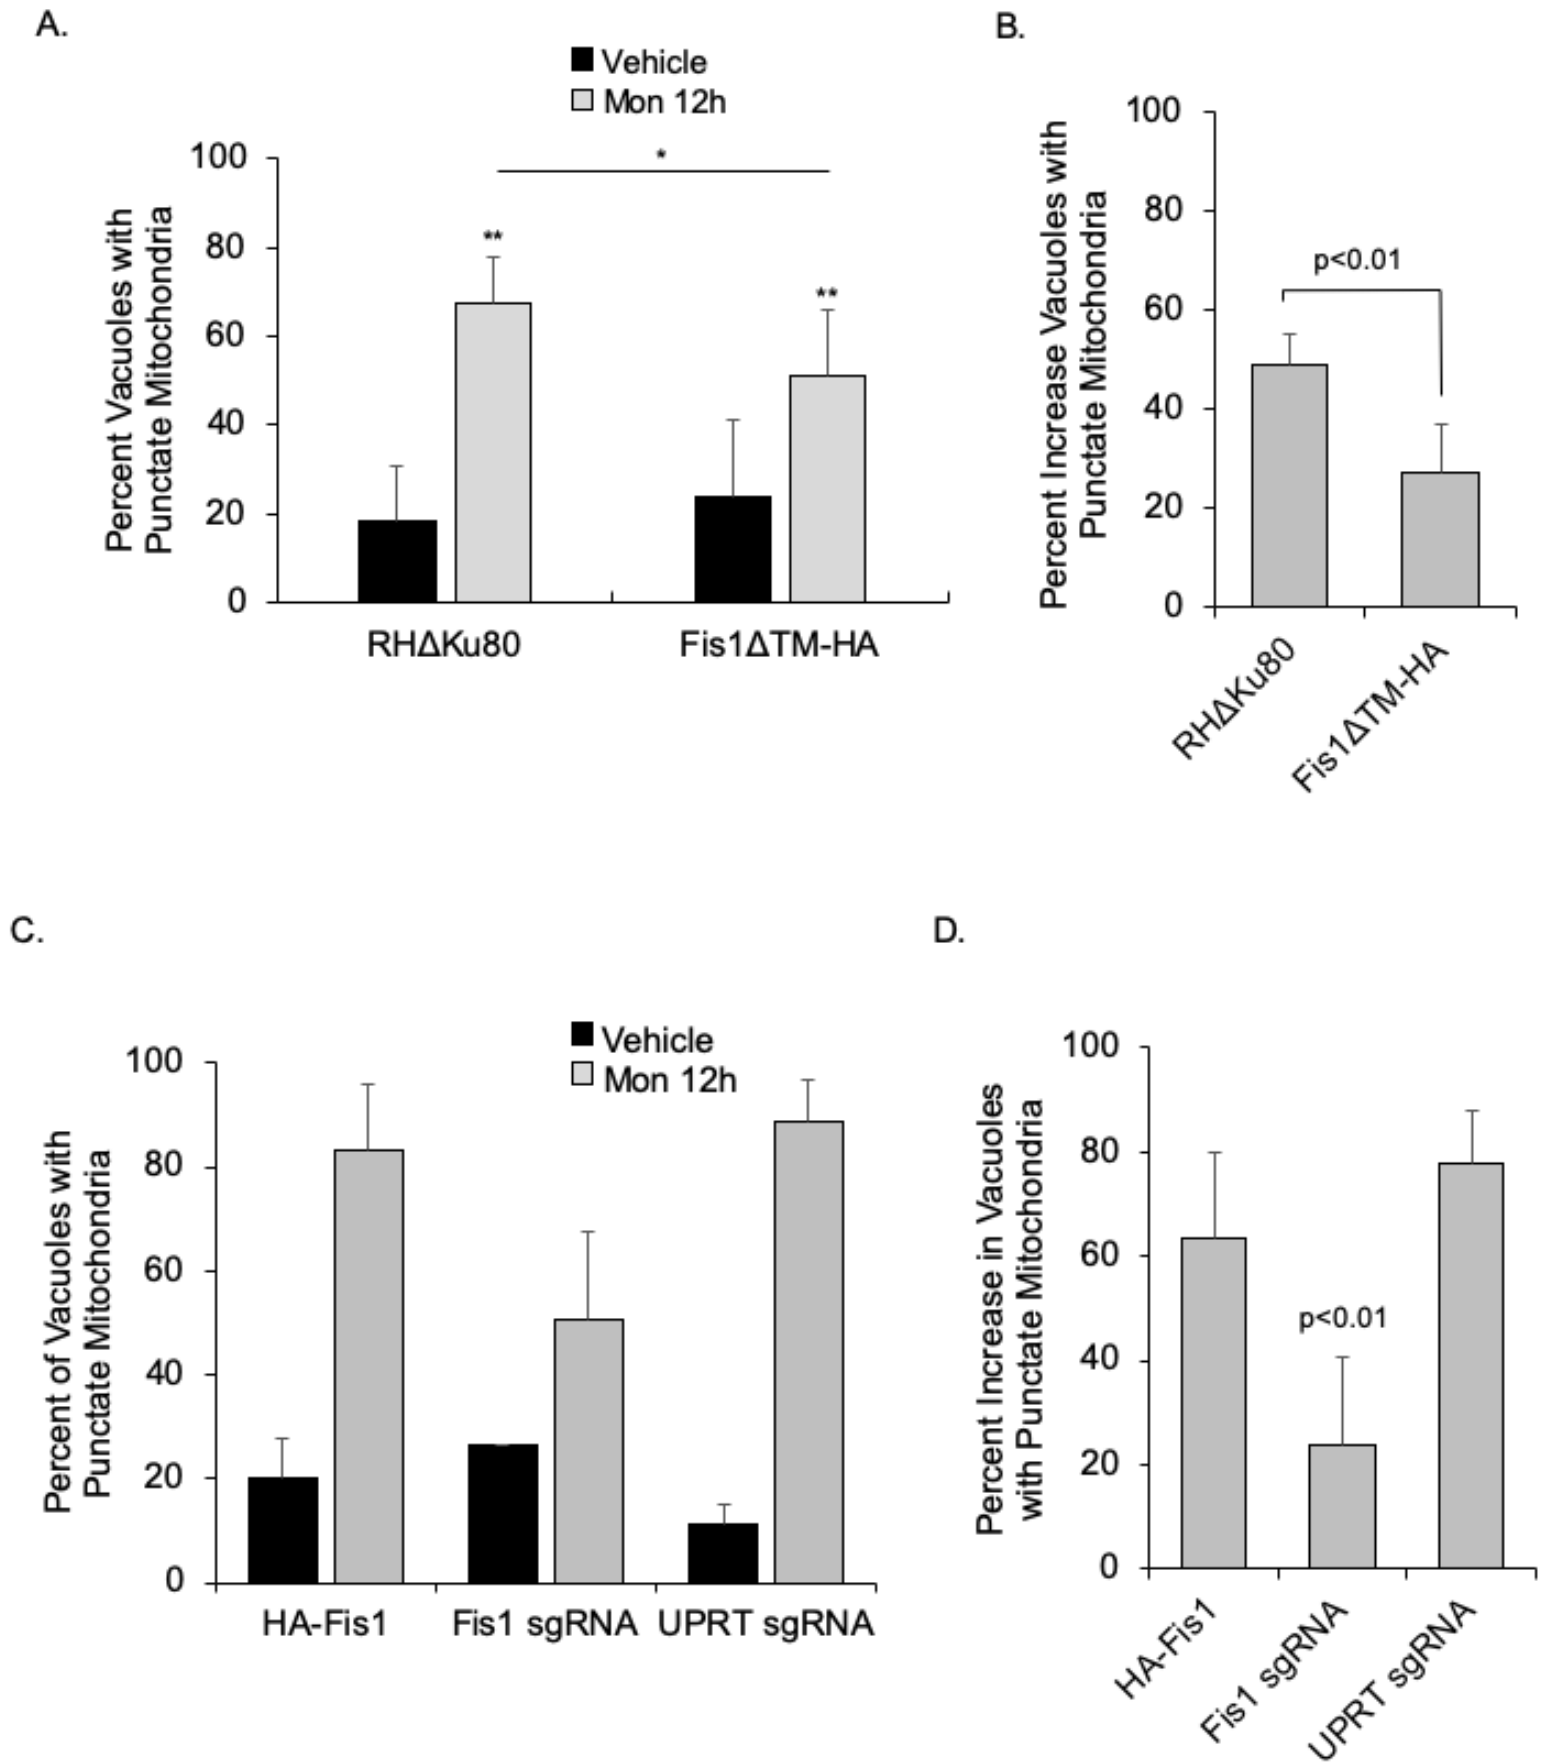

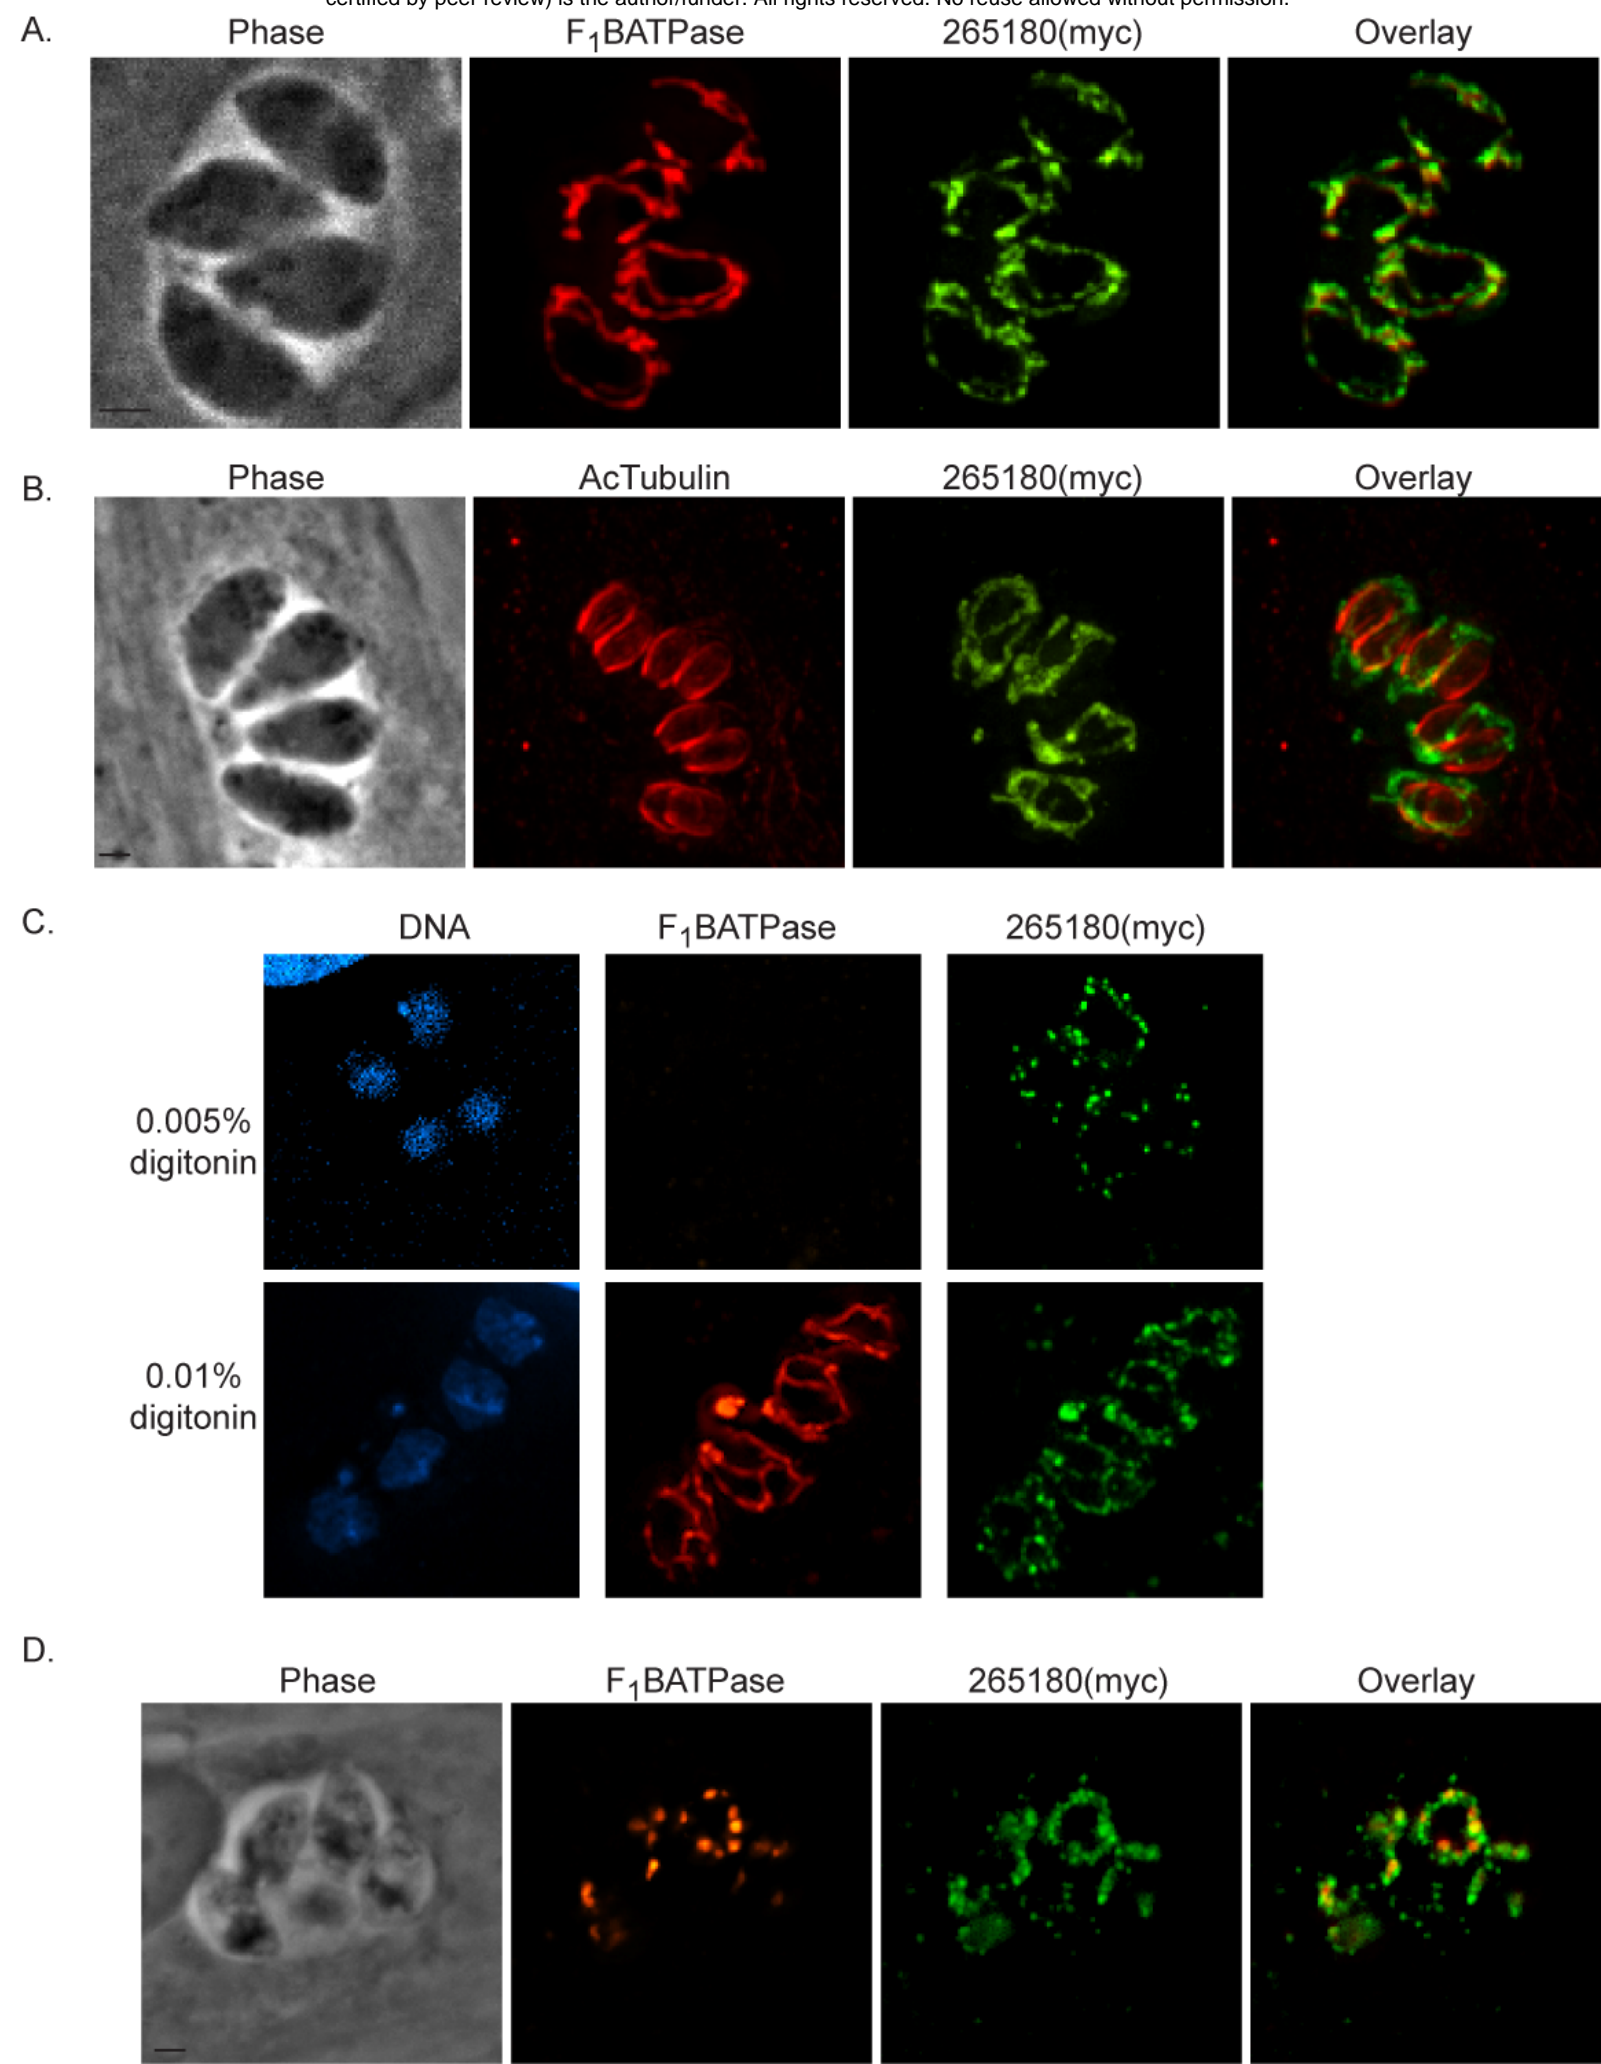

**Figure 6**

bioRxiv preprint doi: <https://doi.org/10.1101/805911>; this version posted October 16, 2019. The copyright holder for this preprint (which was not certified by peer review) is the author/funder. All rights reserved. No reuse allowed without permission.

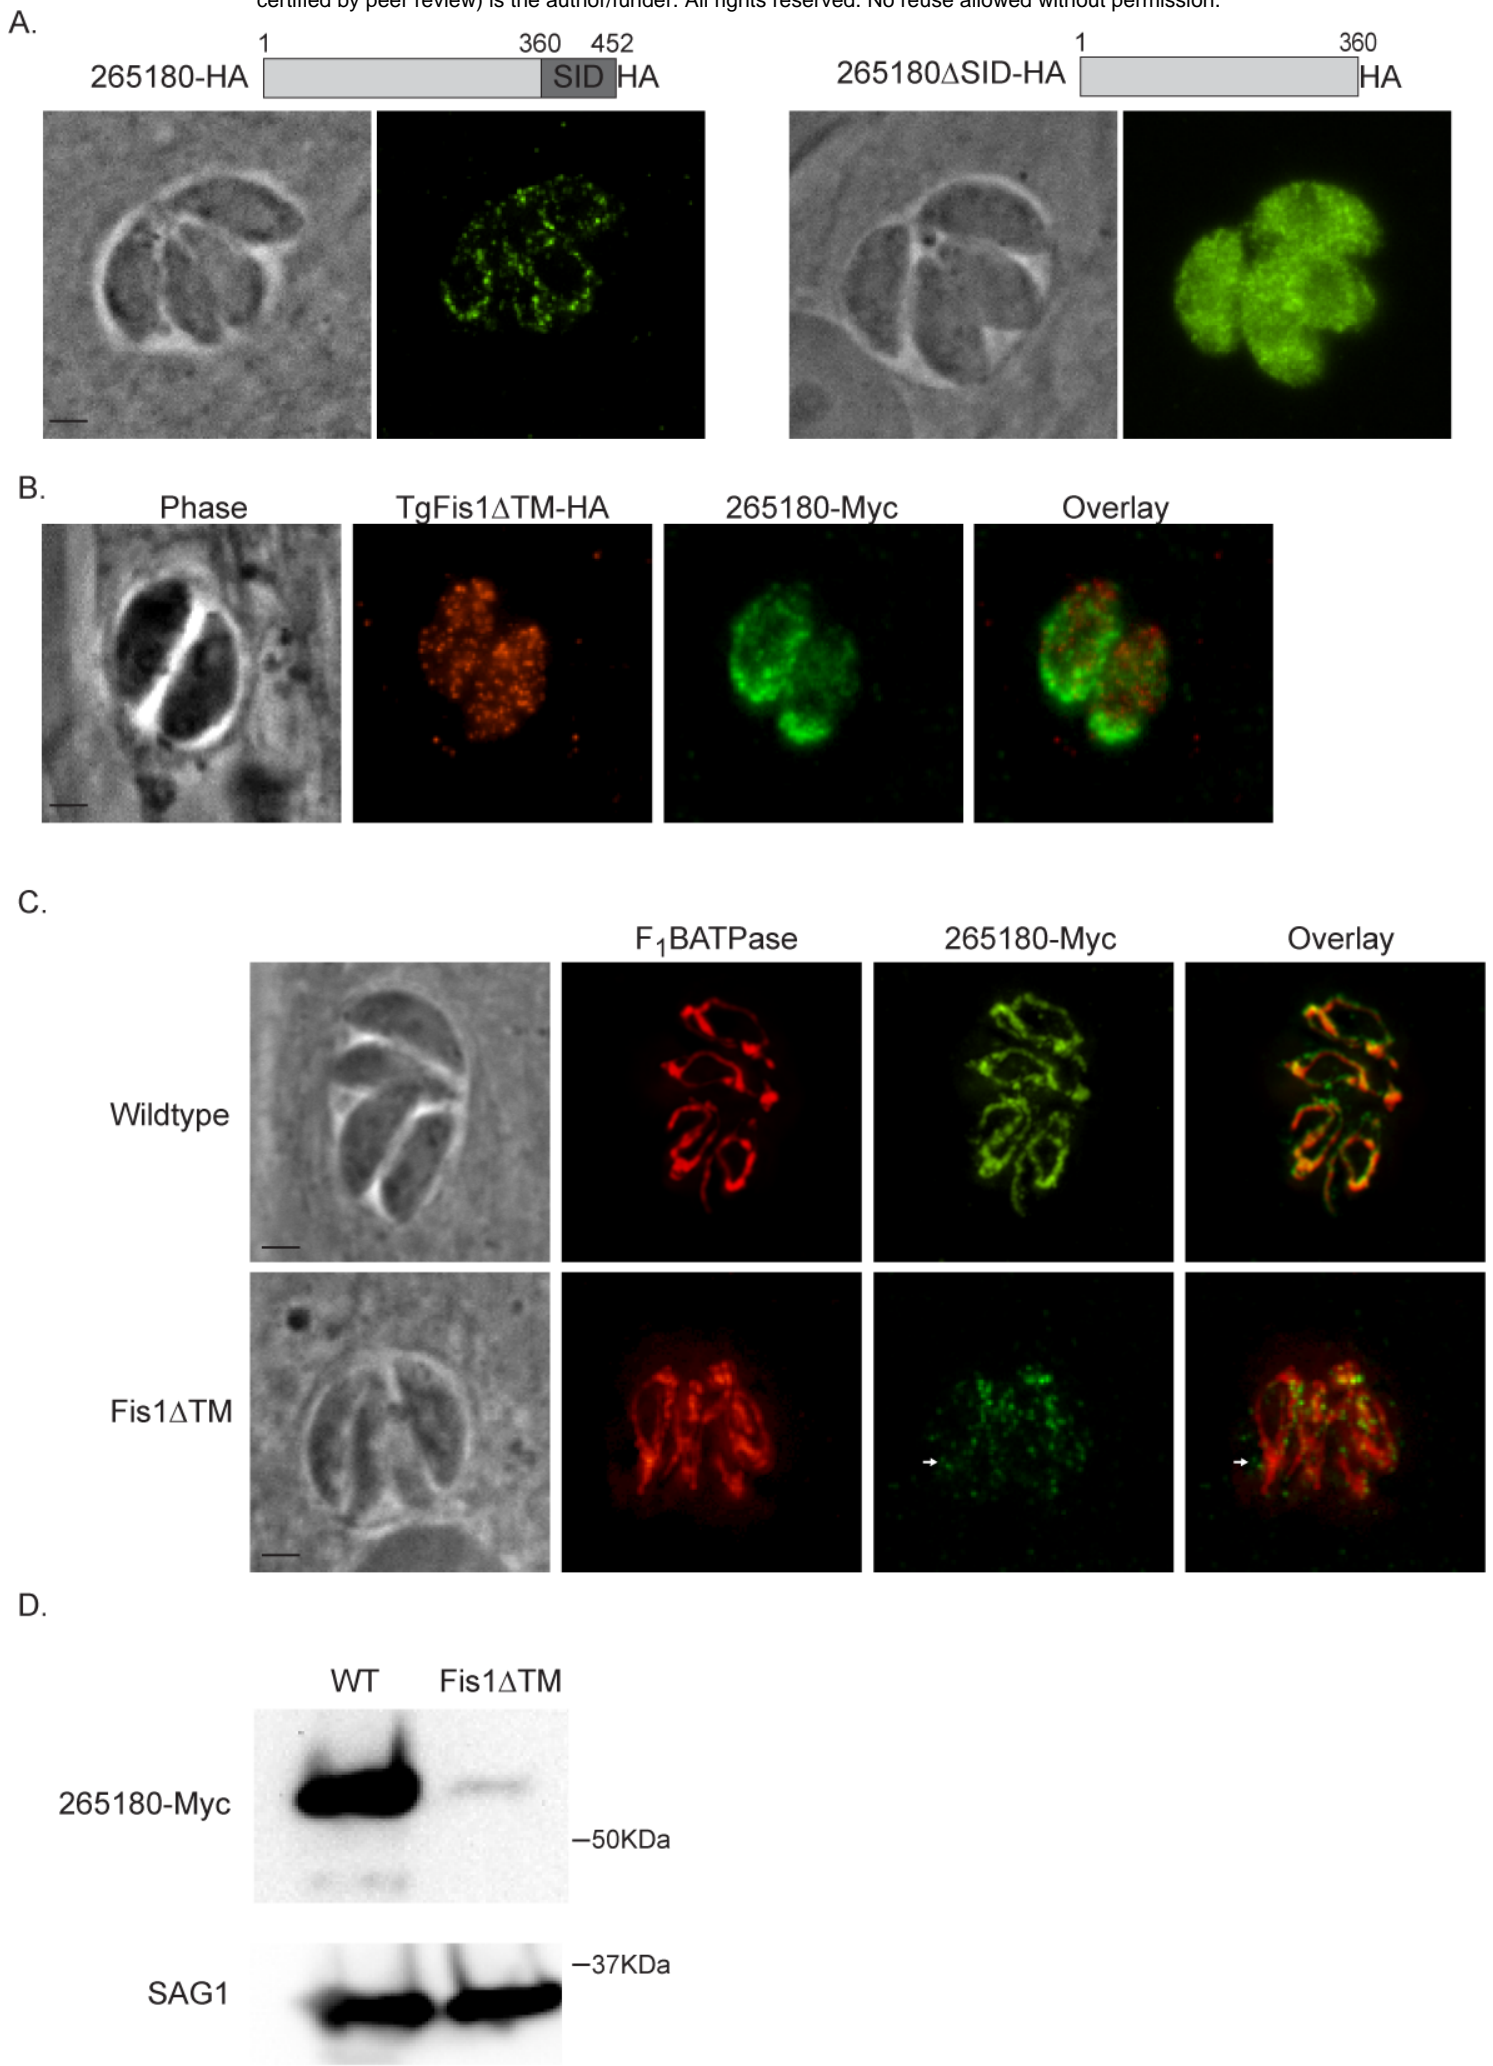

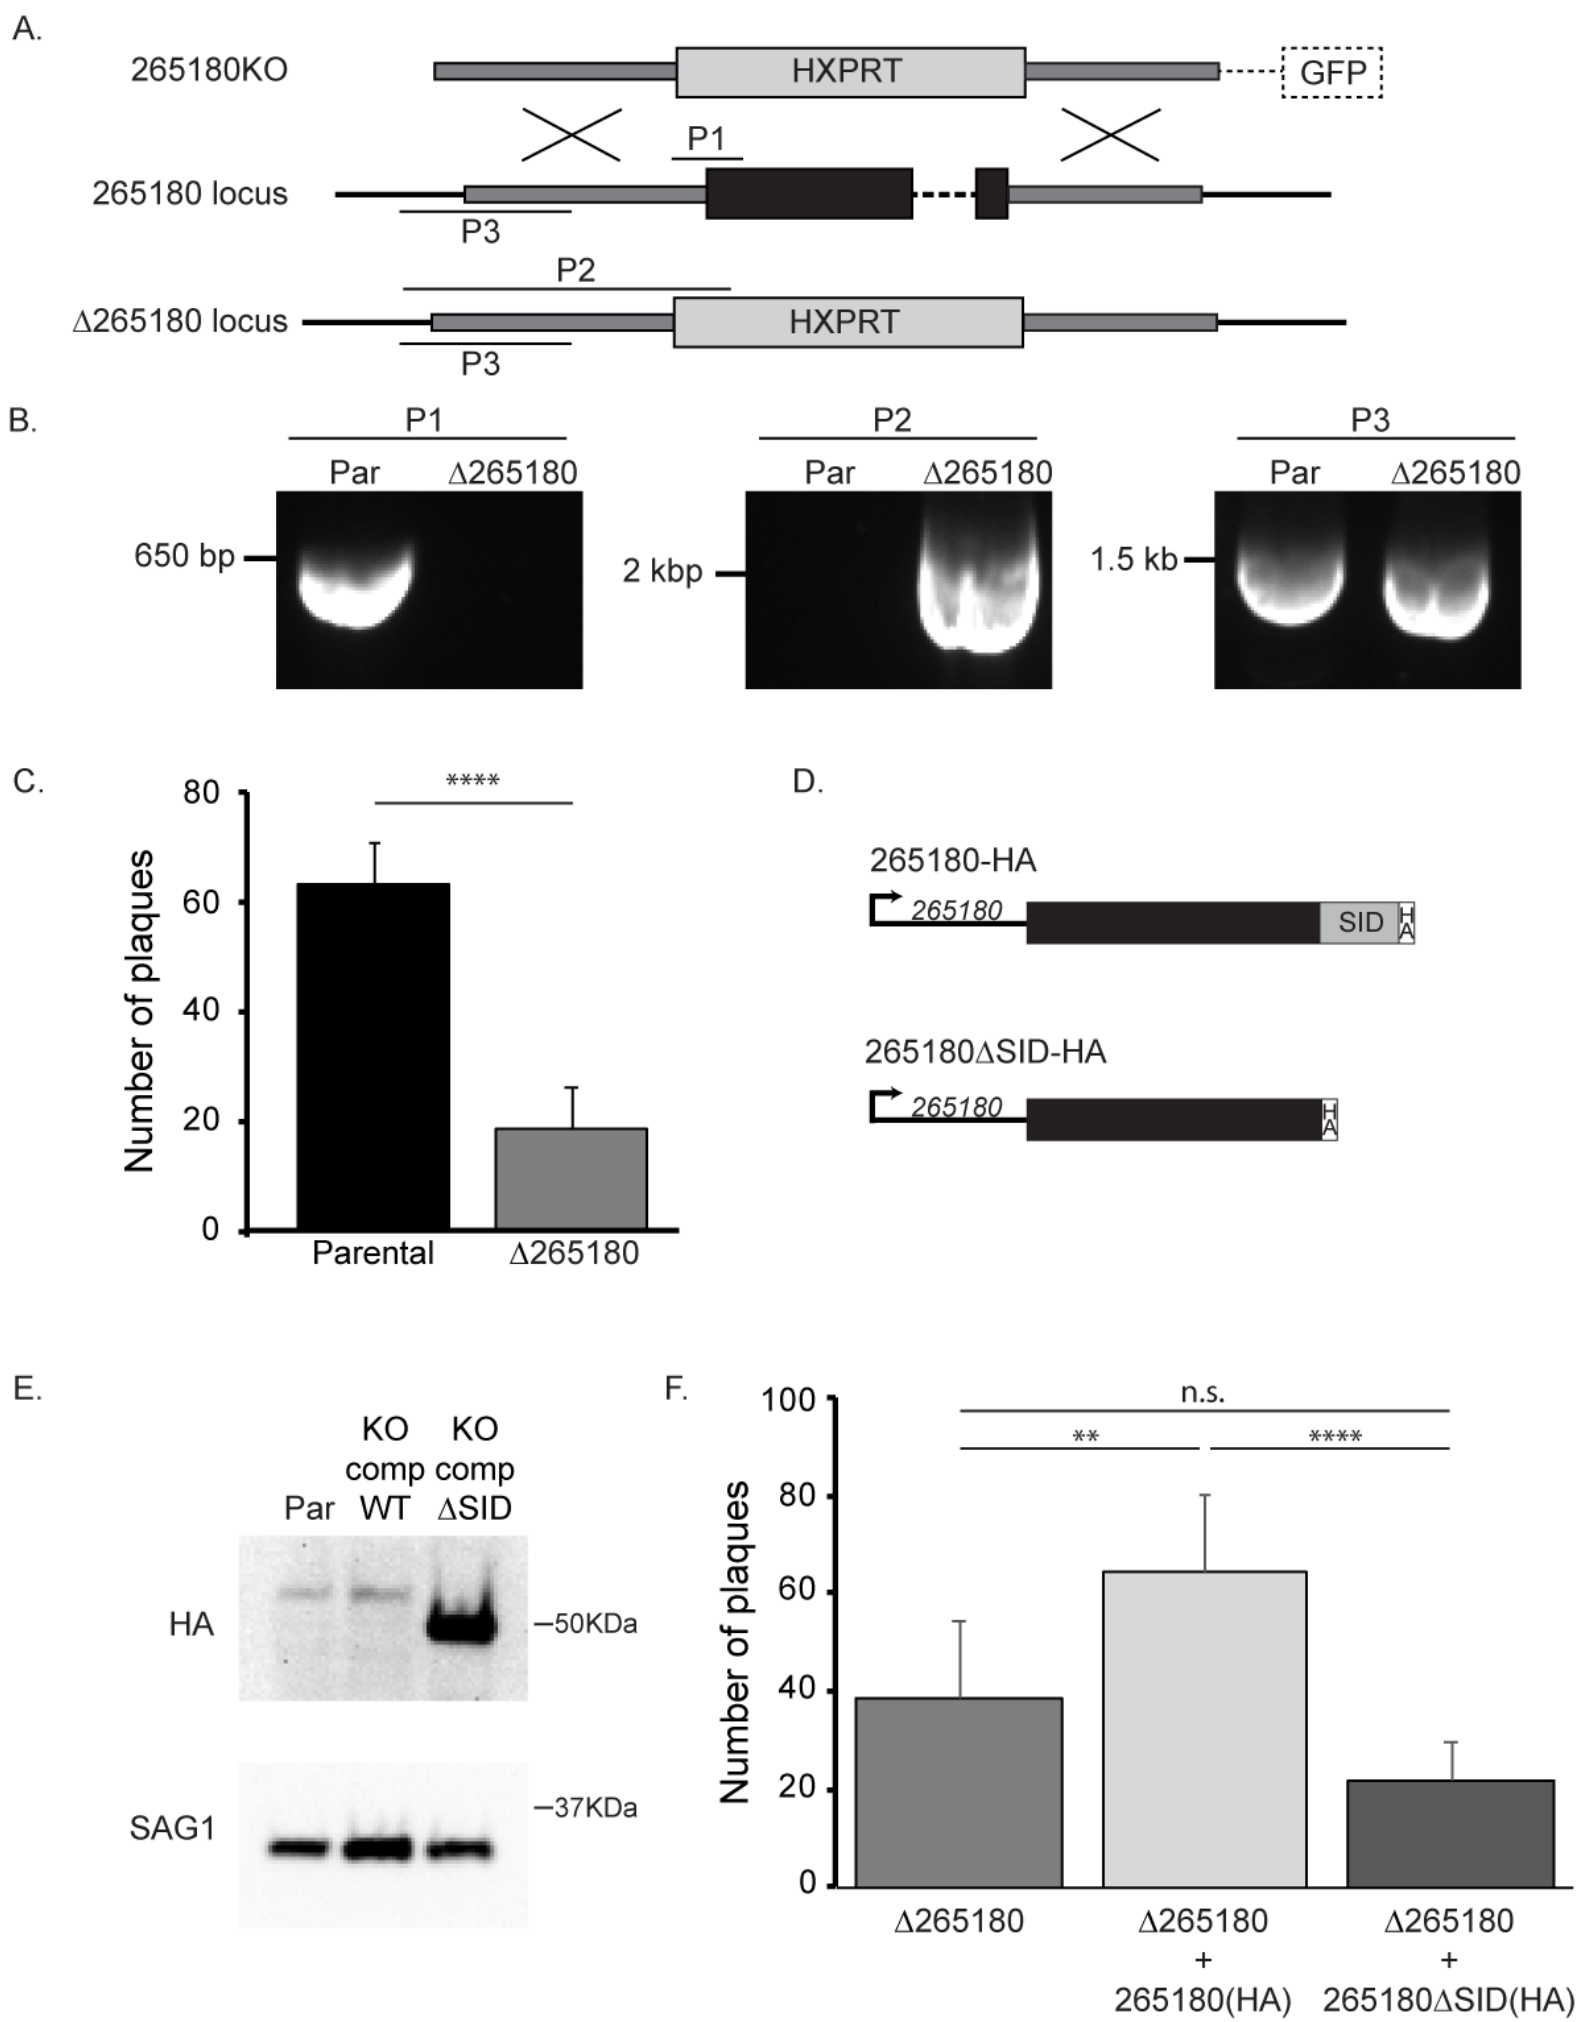



## Figure 8

A.

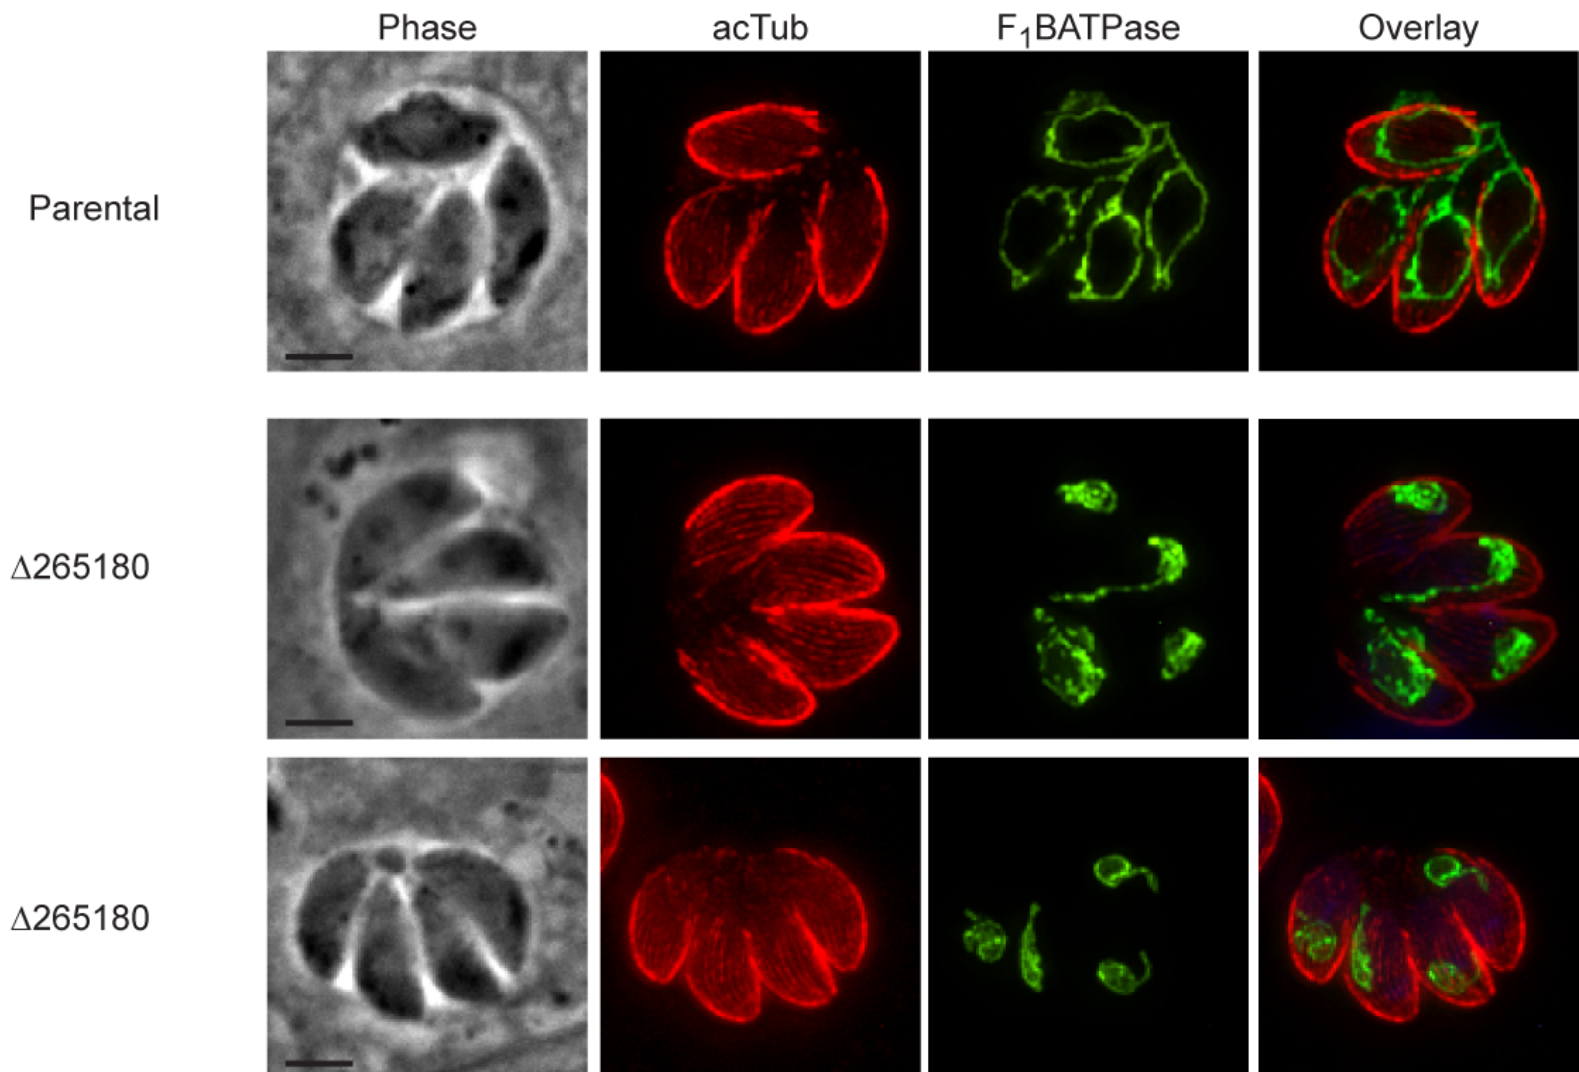

B.

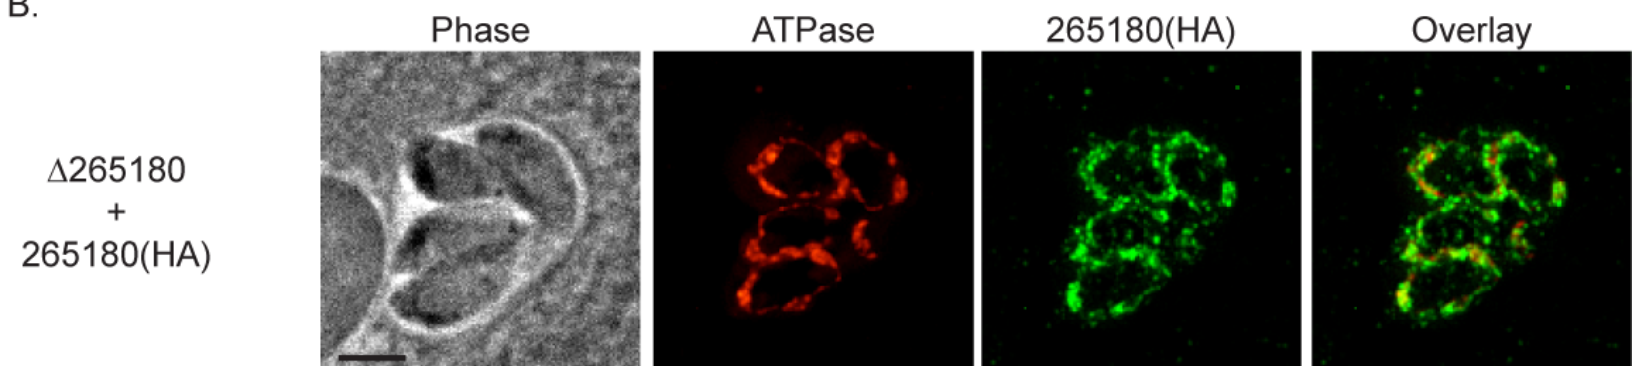

## Figure 9

A.

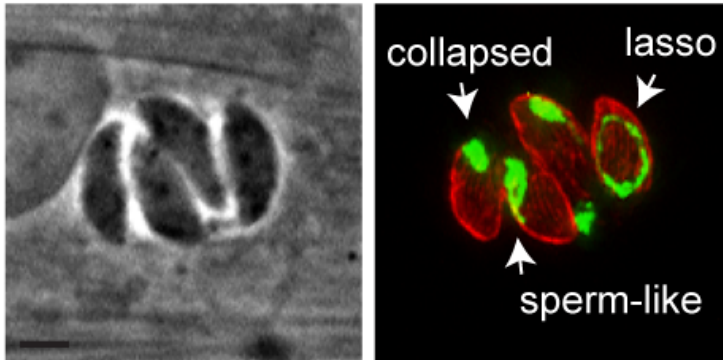

B.

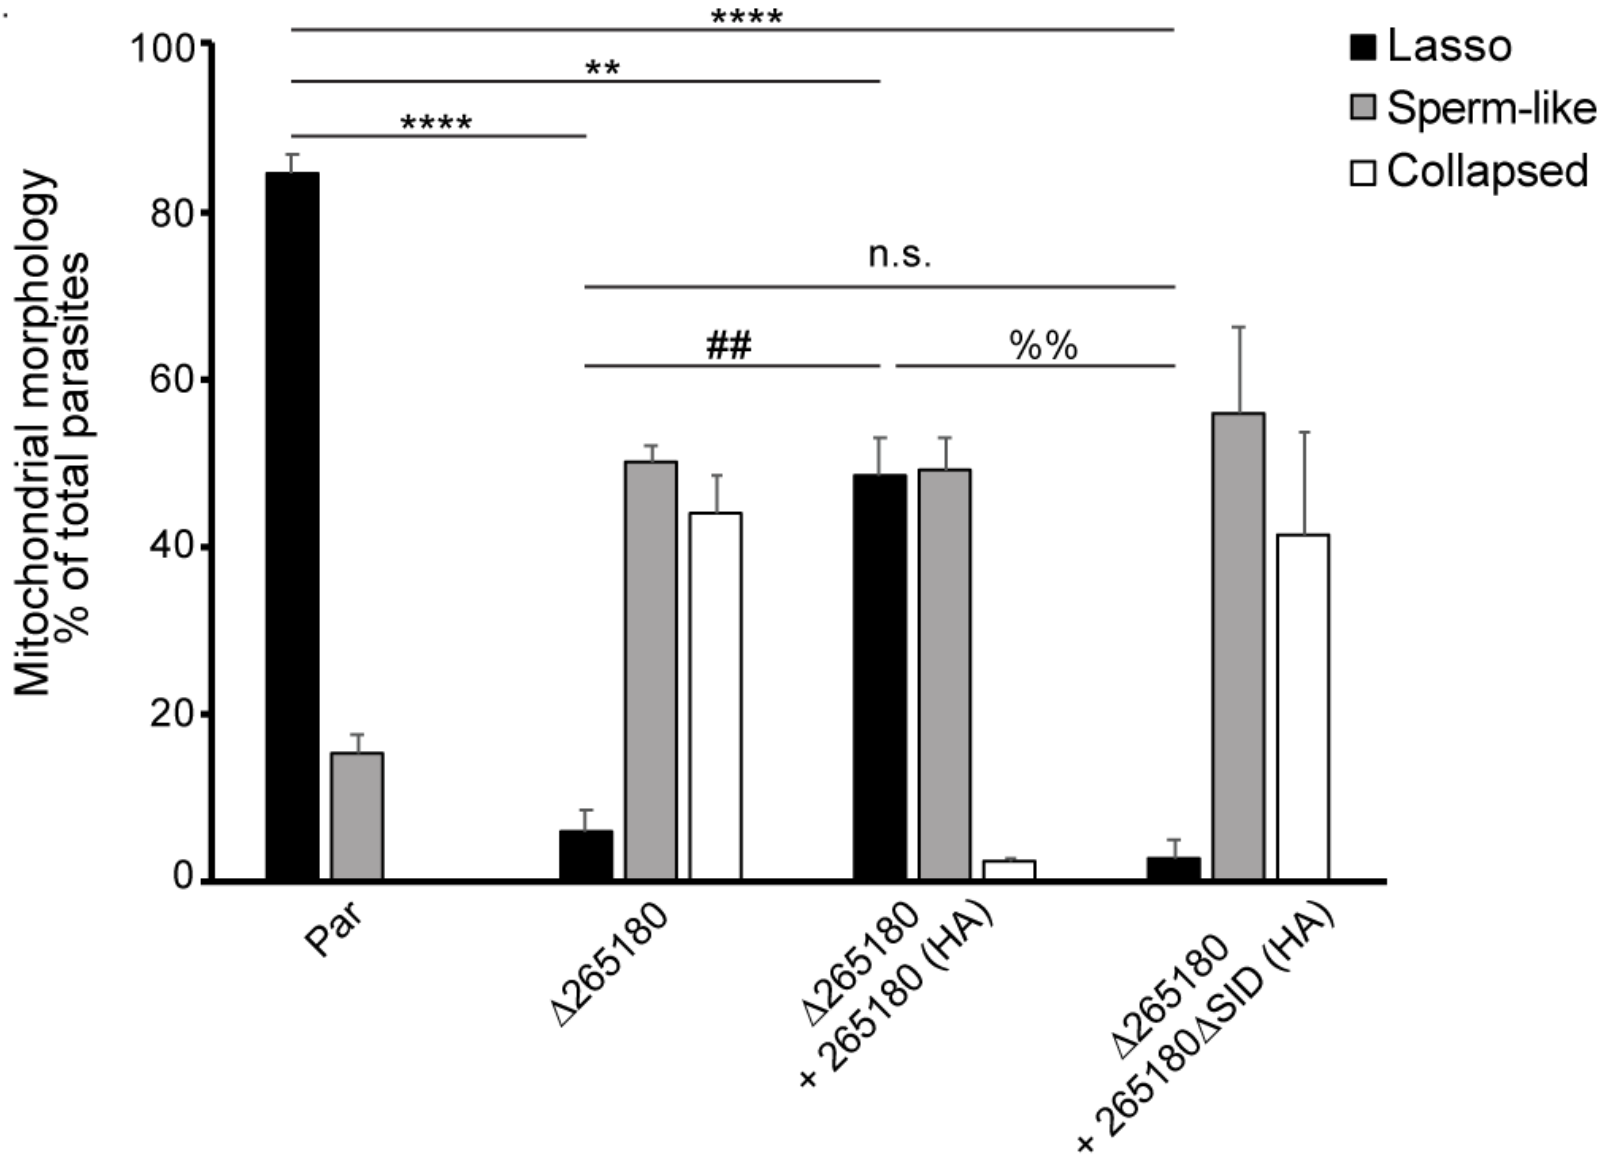

A.

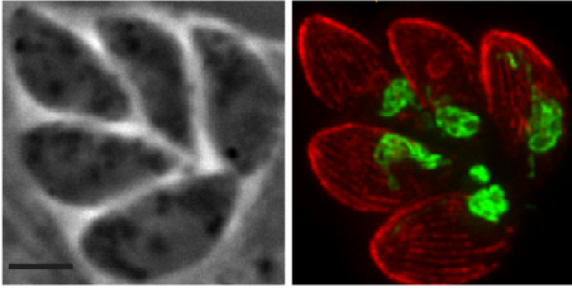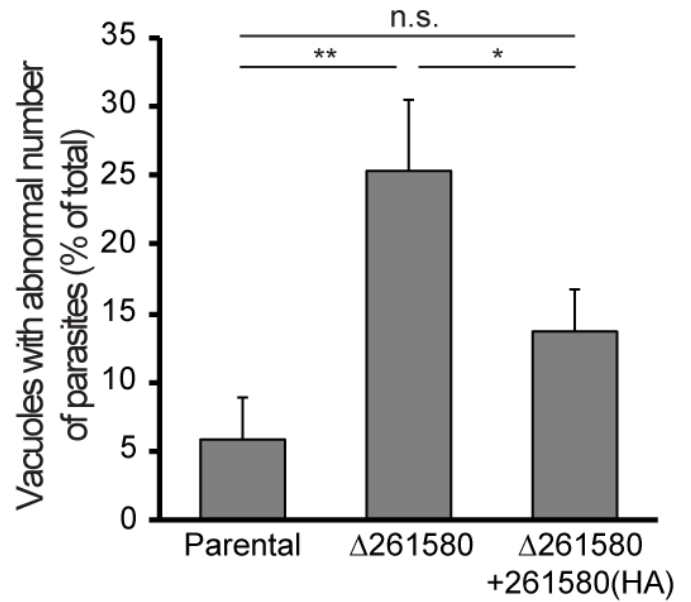

B.

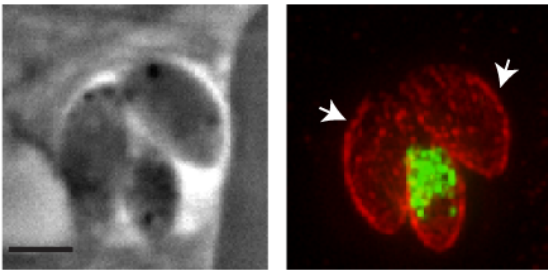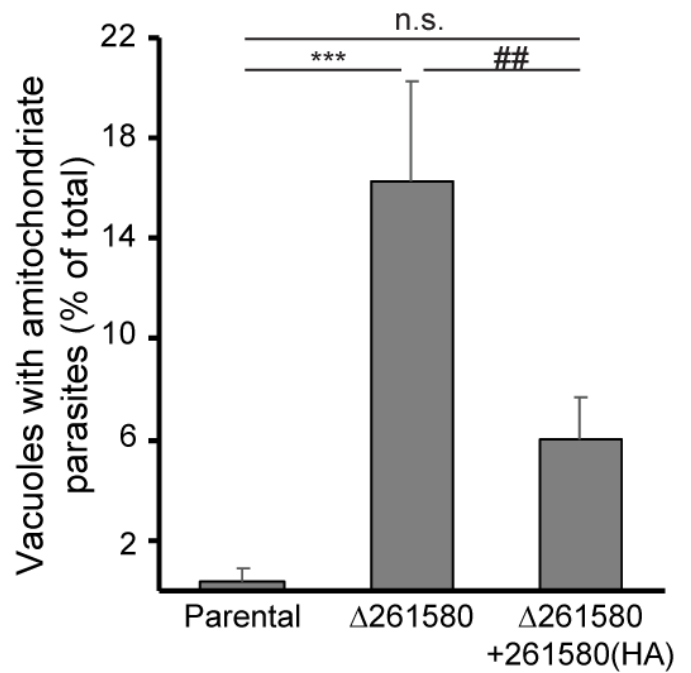

C.

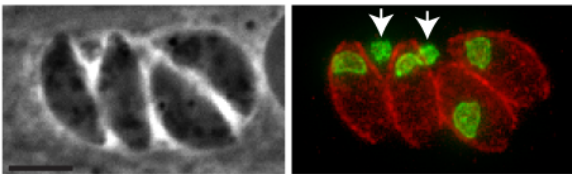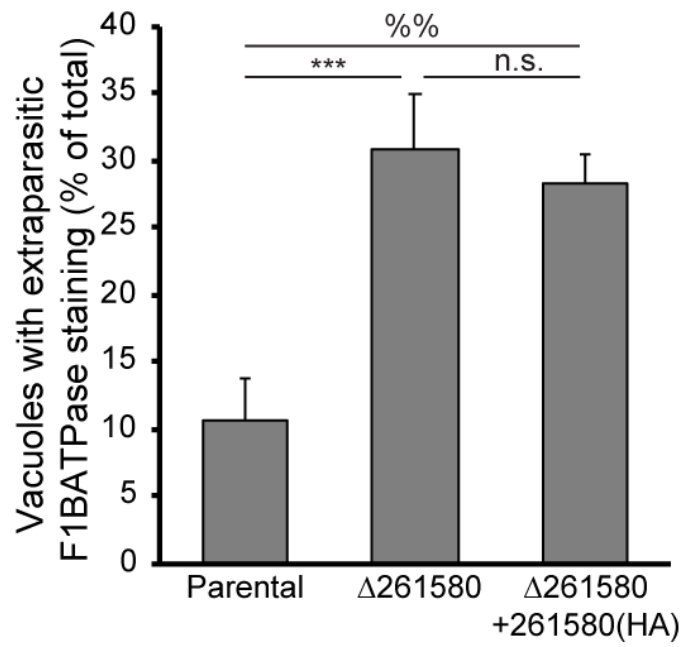

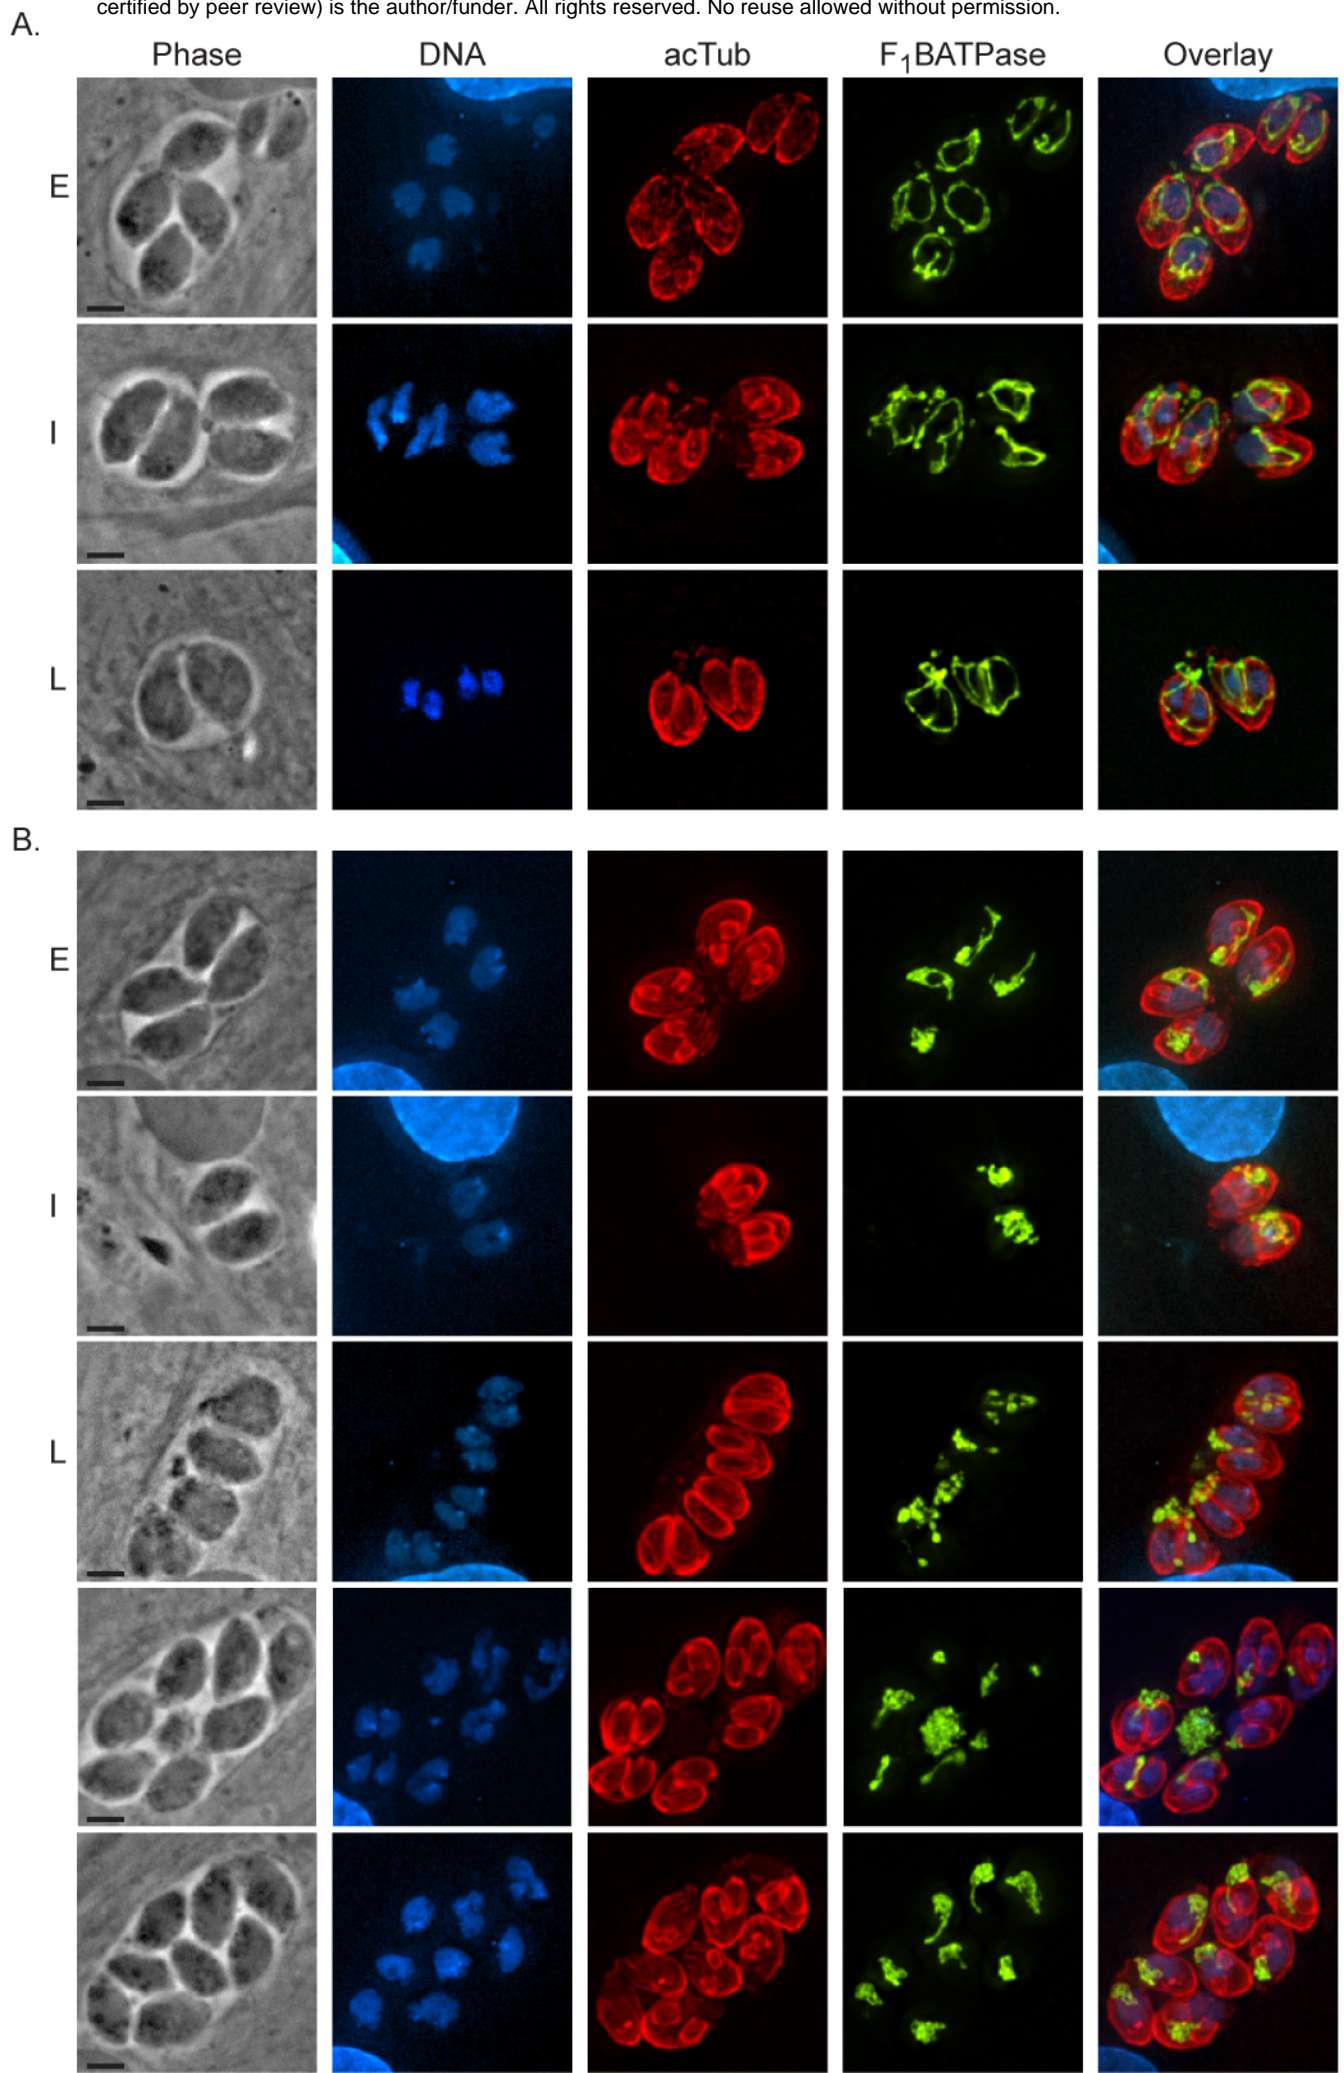

Source: https://www.biorxiv.org/content/10.1101/805911v1.full.pdf
